# Supplementary material for: Post-operative patient-related risk factors for chronic pain after total knee replacement: a systematic review
Source: PubMed Central journal article supplement (PMC5695416; doi:10.1136/bmjopen-2017-018105), 2017-11-03
Supplement: bmjopen-2017-018105.draft_revisions.pdf [file bmjopen-2017-018105.draft_revisions.pdf]

# BMJ Open

BMJ Open is committed to open peer review. As part of this commitment we make the peer review history of every article we publish publicly available.

When an article is published we post the peer reviewers' comments and the authors' responses online. We also post the versions of the paper that were used during peer review. These are the versions that the peer review comments apply to.

The versions of the paper that follow are the versions that were submitted during the peer review process. They are not the versions of record or the final published versions. They should not be cited or distributed as the published version of this manuscript.

BMJ Open is an open access journal and the full, final, typeset and author-corrected version of record of the manuscript is available on our site with no access controls, subscription charges or pay-per-view fees (<http://bmjopen.bmj.com>).

If you have any questions on BMJ Open's open peer review process please email [editorial.bmjopen@bmj.com](mailto:editorial.bmjopen@bmj.com)

# BMJ Open

## Post-operative patient-related risk factors for chronic pain after total knee replacement: a systematic review

|                                 |                                                                                                                                                                                                                                                                                               |
|---------------------------------|-----------------------------------------------------------------------------------------------------------------------------------------------------------------------------------------------------------------------------------------------------------------------------------------------|
| Journal:                        | <i>BMJ Open</i>                                                                                                                                                                                                                                                                               |
| Manuscript ID                   | bmjopen-2017-018105                                                                                                                                                                                                                                                                           |
| Article Type:                   | Research                                                                                                                                                                                                                                                                                      |
| Date Submitted by the Author:   | 06-Jun-2017                                                                                                                                                                                                                                                                                   |
| Complete List of Authors:       | Wylde, Vikki; University of Bristol, Musculoskeletal Research Unit<br>Beswick, Andrew; University of Bristol, School of Clinical Sciences<br>Dennis, Jane; University of Bristol, Musculoskeletal Research Unit<br>Goberman-Hill, Rachael; University of Bristol, School of Clinical Sciences |
| <b>Primary Subject Heading</b>: | Surgery                                                                                                                                                                                                                                                                                       |
| Secondary Subject Heading:      | Health services research                                                                                                                                                                                                                                                                      |
| Keywords:                       | Knee < ORTHOPAEDIC & TRAUMA SURGERY, systematic review, Chronic post-surgical pain, Risk factors                                                                                                                                                                                              |
|                                 |                                                                                                                                                                                                                                                                                               |

SCHOLARONE™  
Manuscripts

Peer Review Only

1  
2  
3 **Post-operative patient-related risk factors for chronic pain after total knee replacement:**  
4  
5 **a systematic review**  
6  
7  
8

9  
10 Wylde V, Beswick AD, Dennis J, Goberman-Hill R  
11

12 Musculoskeletal Research Unit, School of Clinical Sciences, University of Bristol, UK  
13  
14

15  
16  
17  
18  
19 **E-mail addresses**  
20

21 Vikki Wylde: v.wylde@bristol.ac.uk  
22

23  
24 Andrew Beswick: andy.beswick@bristol.ac.uk  
25

26  
27 Jane Dennis: jane.dennis@bristol.ac.uk  
28

29  
30 Rachael Goberman-Hill: r.goberman-hill@bristol.ac.uk  
31  
32

33  
34  
35 **Corresponding author**  
36

37 Vikki Wylde  
38

39  
40 Musculoskeletal Research Unit, Learning and Research Building, Southmead Hospital,  
41

42 Bristol, BS10 5NB, UK. Telephone: 0117 414 7878; E-mail: V.Wylde@bristol.ac.uk  
43  
44

45  
46  
47  
48 Running title: Risk factors for chronic pain after TKR  
49  
50  
51  
52  
53  
54  
55  
56  
57  
58  
59  
60

## ABSTRACT

### Objective

To identify post-operative patient-related risk factors for chronic pain after total knee replacement (TKR).

### Design

The systematic review protocol was registered on PROSPERO (CRD42016041374). MEDLINE, Embase and PsycINFO were searched from inception to October 2016 with no language restrictions. Key articles were also tracked in ISI Web of Science. Cohort studies evaluating the association between patient-related factors in the first three months post-operative and pain at six months or longer after primary TKR surgery were included. Screening, data extraction and assessment of methodological quality were undertaken by two reviewers. The primary outcome was pain severity in the replaced knee measured with a patient-reported outcome measure at six months or longer after TKR. Secondary outcomes included adverse events and other aspects of pain recommended by the core outcome set for chronic pain after TKR.

### Results

After removal of duplicates, 16,430 articles were screened, of which 805 were considered potentially relevant. After detailed evaluation of full-text articles, 14 studies with data from 1,168 participants were included. Post-operative patient-related factors included acute pain (eight studies), function (five studies) and psychosocial factors (four studies). The included studies had diverse methods for assessment of potential risk factors and outcomes and therefore narrative synthesis was conducted. For all post-operative factors, there was insufficient evidence to draw firm conclusions about the association with chronic pain after TKR. Selection bias was a potential risk for all studies, as none were reported to be conducted at multiple centers.

### Conclusion

This systematic review found insufficient evidence to draw firm conclusions about the association between any post-operative patient-related factor and chronic pain after TKR. Further high-quality research is required to provide a robust evidence base on post-operative

1  
2  
3 risk factors, and inform the development and evaluation of targeted interventions to optimize  
4 patients' outcomes after TKR.  
5  
6

7 **Key words:** Total knee replacement, post-operative risk factors, chronic pain, systematic  
8 review  
9

10  
11  
12  
13 **Strengths and limitations of this study**  
14

- 15 • This is the first systematic review of patient-related risk factors for chronic pain after  
16 total knee replacement.
- 17 • Meta-analysis was not possible due to heterogeneity in the assessment of risk factors  
18 and outcomes.
- 19 • We did not include studies that used a composite pain and function measure to assess  
20 outcome.  
21  
22  
23  
24  
25  
26  
27  
28  
29  
30  
31  
32  
33  
34  
35  
36  
37  
38  
39  
40  
41  
42  
43  
44  
45  
46  
47  
48  
49  
50  
51  
52  
53  
54  
55  
56  
57  
58  
59  
60

## INTRODUCTION

Primary total knee replacement (TKR) is a common operation, with over 100,000 operations performed in the UK in 2015 [1, 2] and demand projected to increase dramatically [3].

Patients choose to have a TKR to relieve chronic pain and improve functional ability [4] but approximately 20% of patients experience chronic post-surgical pain [5, 6] defined as pain present at three months after surgery [7]. The impact of chronic pain after TKR is considerable and patients may struggle to cope and adjust to this pain [8]. Provision of services for patients with chronic pain after TKR are patchy and inconsistent [9], with a lack of explicit access points [10]. A systematic review identified that only one intervention has been evaluated for the management of this condition: a single intraarticular botulinum toxin injection [11].

The identification of risk factors for chronic pain after TKR is a fundamental step in designing interventions to improve patient outcomes. Understanding the relevance of non-modifiable factors, such as sex and ethnicity, can help patients and clinicians work together to make informed decisions about TKR. Although some factors may not be modifiable, others may be amenable to intervention. Identification of modifiable patient-related risk factors is an important element in the development of interventions to improve outcome after TKR.

Previous systematic reviews have synthesized the literature on pre-operative risk factors for chronic pain after TKR [12-15]. These reviews have found evidence for a range of modifiable pre-operative patient-related risk factors, including pain intensity, catastrophizing, mental health and co-morbidities. Pre-operative interventions have largely focused on exercise and education and have shown little long-term post-operative benefit [15]. Further interventions specifically targeting pain-related behavior, such as cognitive-behavioral patient education and pain coping skills training, are being evaluated [16, 17].

While the potential value for pre-operatively identifying at risk patients and targeting appropriate interventions is clear, multivariable models have been found to have low predictive power, explaining less than 10% of the variability in chronic pain [18]. An operation itself is an important risk factor for chronic pain [19], and factors relating to the operation and early recovery may be important risk factors. A risk index including pre-surgical variables and acute post-surgical pain had “fair” predictive power for the

1  
2  
3 development of chronic post-surgical pain across diverse surgery types [20]. Therefore, in  
4 addition to evaluating pre-operative risk factors, it is important to consider post-surgical  
5 factors that may limit rehabilitation and recovery, and be associated with chronic pain. If  
6 patients at risk of developing chronic pain could be identified in the early post-operative  
7 period, targeted interventions could be delivered, potentially as part of a comprehensive peri-  
8 operative care package, to prevent the development of chronic pain. Although trials evaluating  
9 the effectiveness of early post-operative interventions on reducing chronic pain have been  
10 conducted [21-24], no systematic review has yet evaluated post-operative risk factors for  
11 chronic pain after TKR. Therefore, the aim of this systematic review was to identify early  
12 post-operative patient-related risk factors for chronic pain after TKR.  
13  
14  
15  
16  
17  
18  
19  
20  
21

## 22 METHODS

### 23 24 25 26 27 Protocol and registration

28 The protocol was registered on the international prospective register of systematic reviews  
29 (PROSPERO) on 6<sup>th</sup> July 2016 (reference: CRD42016041374). Conduct and reporting of this  
30 systematic review adheres to recommendations from PRISMA [25](Appendix 1).  
31  
32  
33  
34  
35

### 36 Eligibility criteria

37 Studies were eligible for inclusion in the review if they met the following PICOS criteria:

38  
39  
40 **Population:** Adults undergoing primary TKR predominantly for osteoarthritis. Studies that  
41 included TKR patients combined with patients undergoing other orthopaedic procedures were  
42 included if separate results were available for TKR patients.  
43  
44

45  
46 **Exposure:** Post-operative patient-related risk factors measured in the first three months after  
47 surgery. Patients with exposure were those with a risk factor (categorical variable) or higher  
48 level of risk factor (continuous variable). The focus of this review was on patient-related risk  
49 factors with the potential for modification or use in targeting care, and therefore studies  
50 which assessed clinical risk factors such as length of stay, post-operative complications, or  
51 radiographic measurements were excluded.  
52  
53  
54  
55  
56  
57  
58  
59  
60

1  
2  
3 **Comparator:** Patients with absence of risk factor (categorical variable) or lower level of risk  
4 factor (continuous variable).  
5

6  
7 **Outcome:** Severity of pain in the replaced knee measured with a patient-reported outcome  
8 measure at six months or longer after TKR surgery.  
9

10  
11 **Study design:** Cohort studies that have explored the relationships between factors measured  
12 in the first three months post-operative and longer-term pain outcomes.  
13

### 14 15 16 17 **Information sources and searches**

18 MEDLINE, Embase and PsycINFO were searched from inception to 17<sup>th</sup> October 2016.  
19 Searches were conducted by experienced systematic reviewers (AB and JD) based on  
20 established design filters [26, 27]. The search strategy combined terms relating to study  
21 design (e.g. cohort, epidemiological study) and population (e.g. knee replacement, knee  
22 arthroplasty). Full search strategies are provided in Appendix 2. No language restrictions  
23 were applied. Searches were supplemented with hand searching of reference lists and review  
24 articles, and key articles were tracked in ISI Web of Science. Conference abstracts were  
25 excluded.  
26  
27  
28  
29  
30  
31  
32  
33

### 34 35 **Study selection and data extraction**

36 Bibliographic details of the articles identified were exported into EndNote X7 (Thomson  
37 Reuters) and duplicates removed. After an initial screening of titles and abstracts by one  
38 reviewer (AB) to remove clearly irrelevant studies, titles and abstracts were screened in  
39 duplicate by two reviewers (AB and VW). As recommended in the Cochrane Handbook [28],  
40 reviewers were 'over inclusive' at early stages and retained any potentially relevant studies.  
41 Full text of all such reports were acquired and assessed for eligibility against the PICOS  
42 criteria in duplicate by two reviewers (AB and VW). Discrepancies were resolved in  
43 discussion with a third reviewer (JD). Data from articles that met the eligibility criteria were  
44 extracted into an Excel database by one reviewer (VW) with checking against source articles  
45 by a second reviewer (AB or JD). Extracted data comprised: country, date, setting,  
46 population, participant demographics, study methodology including statistical analysis, risk  
47 factors, time to follow up, losses to follow up, joint-specific pain outcomes, variables  
48  
49  
50  
51  
52  
53  
54  
55  
56  
57  
58  
59  
60



1  
2  
3 included in multivariable analyses and information relevant to assessment of study  
4 methodological quality.  
5

6  
7 Where necessary, authors of studies were contacted for further information to enable  
8 judgements about eligibility and/or to provide unpublished outcome data relevant to the  
9 review. If data from patients with TKR were combined with patients undergoing other  
10 orthopaedic procedures, separate data for patients with TKR were requested. If a combined  
11 pain and function outcome was reported, such as the Oxford Knee Score or WOMAC score,  
12 separate pain-specific data were requested, e.g. the Oxford Knee Score pain subscale or  
13 WOMAC pain scale.  
14  
15  
16  
17  
18  
19  
20

## 21 **Outcomes**

22  
23 The primary outcome was pain severity in the replaced knee measured with a patient-reported  
24 outcome measure at six months or longer after TKR. Secondary outcomes included adverse  
25 events and other aspects of pain recommended by the core outcome set for chronic pain after  
26 TKR [29]. These included pain interference with daily living, pain and physical functioning,  
27 temporal aspects of pain, pain description, emotional aspects of pain, use of pain medication,  
28 and satisfaction with pain relief. No limits were placed on the tools used to measure these  
29 outcomes.  
30  
31  
32  
33  
34  
35  
36  
37

## 38 **Assessment of methodological quality of included studies**

39  
40 A non-summative checklist, which consisted of four items to assess selection bias (inclusion  
41 of consecutive patients and representativeness), bias due to missing data (follow-up rates) and  
42 bias due to inadequate consideration of confounding (multivariable or univariable analysis)  
43 was developed for use in this review. These items were informed by existing tools, including  
44 the MINORS [30], Newcastle-Ottawa quality assessment scale [31] and the ROBINS-I tool  
45 [32]. Each item was rated as adequate, not adequate or not reported. Each individual item  
46 rating is reported, rather than an overall score, as summative scales risk rating reporting  
47 rather than conduct [33]. Ratings of methodological quality for included studies were  
48 conducted independently by two reviewers (VW and JD) and any discrepancies were  
49 resolved in discussion with a third reviewer (AB).  
50  
51  
52  
53  
54  
55  
56  
57  
58  
59  
60

## Data synthesis

In the protocol, meta-analyses were planned if two or more studies assessed the same risk factor with suitable methodology. In comparing groups of patients with or without a risk factor, outcomes adjusted for baseline patient factors would be considered in preference to unadjusted outcomes and the effect of non-adjustment would be explored in a sub-group analysis. If studies reported categorical pain outcomes, risk ratios would be used to summarize cohort studies and odds ratios for case-control studies. For risk factors reported as continuous variables, results of meta-analyses would be reported as mean differences or standardized mean differences, depending on the consistency of risk factor and outcome measures reported. We planned to explore the effect of non-adjustment for other variables in a sub-group analysis. Assessment of heterogeneity was planned using the chi-squared and I-squared statistic. The protocol stated that we would conduct a sensitivity analyses on methodological quality assessment.

At analysis stage, opportunities for meta-analysis were limited by heterogeneity in the assessment of risk factors and outcomes. Therefore, we undertook a descriptive narrative analysis, in keeping with the approach recommended by the Cochrane Handbook [28].

## RESULTS

After removal of duplicates, 16,430 articles were screened, of which 857 were considered potentially relevant. After detailed evaluation of full-text articles, 14 studies with data from 1,613 participants were included [34-47](Figure 1). The most common reasons for excluding potentially relevant studies were because patient-related factors were not assessed and follow-up after TKR surgery was less than six months.

Authors of 17 studies were contacted to clarify eligibility criteria (n=6), request disaggregated data for patients with TKR (n=9) or request pain-specific outcome data (n=2). Disaggregated data for patients with TKR were provided by authors for two studies [41, 47].

## Study characteristics

An overview of study characteristics is provided in Table 1. Of the 14 included studies, three were from the UK, two each from Australia, USA and Spain, and one study from Belgium,

1  
2  
3 Denmark, France, Portugal and Serbia. Thirteen studies were conducted at a single center and  
4 one study did not report the number of centres. Eleven of the studies were cohort studies, two  
5 were randomized controlled trials analyzed as cohort studies and one was a case-control  
6 study with prospective data collection. Sample sizes ranged from 23 to 402, with a median of  
7 115 participants. One study included a small number of patients undergoing  
8 unicompartamental knee replacement but was included in the review as 83% of participants  
9 had TKR [45]. Follow-up assessments varied: four studies assessed outcomes at six months  
10 after TKR, five at 12 months and the remainder between 3-7 years post-operative. Pain at  
11 follow-up was evaluated using the WOMAC Pain scale [48](five studies), numerical rating  
12 scale (three studies), visual analogue scale (two studies), American Knee Society Score Pain  
13 question [49] (two studies), and verbal descriptor scale (two studies). Secondary outcomes for  
14 the review relating to serious adverse events and other aspects of pain outcomes were  
15 infrequently reported and therefore not summarized.  
16  
17  
18  
19  
20  
21  
22  
23  
24  
25  
26  
27

### 28 **Assessment of methodological quality of included studies**

29  
30 Ratings of methodological quality for the 14 included studies are provided in Table 2. Eight  
31 studies reported that consecutive patients were recruited, eight studies followed up >80%  
32 participants, and nine studies conducted multivariable analysis. All studies had issues relating  
33 to selection bias because none were reported as being conducted at multiple centers.  
34  
35  
36  
37  
38  
39

### 40 **Patient-related post-operative risk factors**

41  
42 Patient-related post-operative risk factors were categorized into three groups: acute post-  
43 operative knee pain, knee function and psychosocial factors.  
44  
45

#### 46 *Acute post-operative knee pain*

47  
48 Eight studies including data from 737 participants evaluated the association between pain in  
49 the first three months after TKR and chronic pain (Table 3). Timing of acute postoperative  
50 pain was classified as: pain within the first postoperative week; pain between one and two  
51 weeks postoperative; and pain from two weeks to three months. Pain as a risk factor was  
52 assessed using a Visual Analogue Scale (three studies), verbal descriptor scale (two studies),  
53 Numeric Rating Scale (two studies), WOMAC Pain scale (one study) and PainDETECT (one  
54  
55  
56  
57  
58  
59  
60

1  
2  
3 study). Five studies conducted multivariable analysis, two studies conducted univariable  
4 analysis and for one study no statistical analysis was performed as data were provided by  
5 authors on a small subset of patients with TKR.  
6  
7

#### 8 9 *Pain severity on post-operative days 1-7*

10  
11 Four studies with data from 491 participants evaluated whether pain severity in the first week  
12 after surgery was associated with chronic pain [37, 41, 43, 45]. Two were at risk of bias due  
13 to missing data and one study was at risk of bias due to inadequate consideration of  
14 confounding. Methods used to assess pain were verbal descriptor scale [37], VAS [43] and  
15 NRS [41, 45]. Three studies found that more severe acute post-operative pain was associated  
16 with more severe pain at 6-12 months after TKR [37, 43, 45], although in one study this  
17 association was attenuated completely after adjustment for pre-operative pain [43]. One study  
18 with found no association between pain at 42 hours after surgery and the presence of chronic  
19 pain at 4-6 months [41].  
20  
21  
22  
23  
24  
25

#### 26 27 *Pain severity in post-operative days 8-14*

28  
29 Three studies with data from 191 participants evaluated whether pain severity on post-  
30 operative days 8-14 was associated with chronic pain [34, 37, 47]. One study was at risk of  
31 bias due to missing data and two studies were at risk of bias due inadequate consideration of  
32 confounding. Pain was assessed in two studies with a verbal descriptor scale [37, 47] and in  
33 one with the WOMAC pain scale and VAS [34]. Pain on post-operative day eight and at two  
34 weeks was not found to be associated with chronic pain in two studies [34, 37], and  
35 descriptive data only were available for the study that evaluated pain on post-operative day  
36 10 [47]. In the study with low risk of bias apart from with regard to representativeness [34],  
37 pain severity at two weeks was not found to be associated with pain at six months after TKR  
38  
39  
40  
41  
42  
43  
44

#### 45 46 *Pain severity between 2 weeks and 3 months post-operative*

47  
48 Five studies with data from 314 participants evaluated whether pain severity between two  
49 weeks and three months post-operative was associated with chronic pain after TKR [34, 35,  
50 37, 40, 47]. Two studies were at risk of bias due to missing data and three studies were at risk  
51 of bias due to inadequate consideration of confounding. Methods to assess pain were the  
52 WOMAC pain scale [34], VAS [34, 35, 40] and verbal descriptor scale [37, 47]. In one study  
53 with risk of bias associated only with conduct at a single center, pain severity at eight weeks  
54 post-operative was found to be associated with pain at six months post-operative when  
55  
56  
57  
58  
59  
60

1  
2  
3 assessed with the WOMAC but not the VAS [34]. In one study with univariable analysis,  
4 pain severity assessed on day 30 was found to be associated with pain severity at six months  
5 but not 12 months after TKR [37]. The same study found that pain at three months post-  
6 operative was not associated with pain severity at six months and 12 months post-operative  
7 [37]. In another study, neuropathic pain at six weeks post-operative was found to be  
8 moderately associated with pain at 39-51 months after surgery [40]. In one study, there was  
9 no difference in verbal descriptor scale pain at 12 months in patients with different average  
10 pain levels at six weeks [47]. However considering 'worst' pain, 7/14 patients with moderate  
11 to severe pain at six weeks reported moderate to severe pain at 12 months compared with 1/9  
12 patients with none or mild pain at six weeks. A study which assessed global pain and night  
13 pain at one month and three months post-operative found that they were associated with  
14 global pain and night pain respectively at a future time point (six months and 12 months)  
15 [35].  
16  
17  
18  
19  
20  
21  
22  
23  
24  
25  
26  
27

### 28 ***Knee function***

29  
30 Five studies including data from 835 participants evaluated the association between post-  
31 operative knee function and chronic pain after TKR (Table 4). Three studies were at risk of  
32 bias due to missing data and one study was at risk of bias due to inadequate consideration of  
33 confounding. Assessment of knee function varied and included range of motion, ambulatory  
34 status, WOMAC Function, six minute walk test and stair ascent speed.  
35  
36  
37

38  
39 Four studies including data from 735 participants evaluated whether function at hospital  
40 discharge was associated with chronic pain after TKR [36, 38, 39, 42]. Two of these studies  
41 assessed range of motion [36, 42] and two assessed ambulatory status at discharge [38, 39];  
42 none found an association. One study at low risk of bias except inclusion of a single center  
43 with 100 patients evaluated whether function at two weeks and eight weeks, assessed using  
44 three different methods, was associated with WOMAC Pain scores at six months post-  
45 operative [34]. This study found that WOMAC Function score at two weeks, but not eight  
46 weeks, was associated with chronic pain; six minute walk test at both two weeks and eight  
47 weeks was associated with chronic pain; stair ascent speed at two and eight weeks was not  
48 associated with chronic pain.  
49  
50  
51  
52  
53  
54

### 55 ***Psychosocial factors***

1  
2  
3 Four studies including data from 226 participants evaluated the association between post-  
4 operative psychological factors and chronic pain after TKR (Table 5). Two studies were at  
5 risk of bias due to missing data and one study was at risk of bias due to inadequate  
6 consideration of confounding. Risk factors assessed included catastrophizing, depression,  
7 social support, coping skills, fear of movement and anxiety. In one study, catastrophizing at a  
8 previous time point was a risk factor for night pain, but not global pain, at a future time point  
9 [35]. In the same study, depression was found to be a risk factor for global pain but not night  
10 pain. Another study assessing risk factors at six weeks post-operative found that perceived  
11 positive social support was associated with less chronic pain, negative social support with  
12 more chronic pain, and no association between coping and pain at six months after TKR [44].  
13 At two weeks post-operative, patients with a high fear of movement at two weeks post-  
14 operative reported more pain at six months than those with a low fear of movement [46].  
15 Greater anxiety at 48 hours after surgery was found to be associated with a higher risk of  
16 having a pain score of >3 on a numeric rating scale at 4-6 months after TKR [41].  
17  
18  
19  
20  
21  
22  
23  
24  
25  
26  
27

## 28 **DISCUSSION**

29 This is the first systematic review to evaluate post-operative patient-related risk factors for  
30 chronic pain after TKR. Fourteen cohort studies were identified which evaluated the  
31 association between patient-related factors measured in the first three months post-operative  
32 and pain severity measured with a patient-reported outcome measure at six months or longer  
33 after primary TKR. Post-operative factors assessed included pain (eight studies), function  
34 (five studies) and psychosocial factors (four studies).  
35  
36  
37  
38  
39

40 For all post-operative patient-related factors, there was insufficient evidence to draw firm  
41 conclusions on the association with chronic pain after TKR. When reviewing observational  
42 cohort studies, it is essential to consider issues that may introduce bias and lead to potentially  
43 misleading results and their interpretation. The key issues relate to generalizability,  
44 incomplete follow up and accounting for confounding factors. Regarding generalizability,  
45 findings from single-center and multi-center studies can differ [50], and one potential factor  
46 contributing to this difference is the recruitment of a more homogeneous population in single-  
47 center studies. The population may be highly selected and therefore have limited validity  
48 external to the study setting. Losses to follow represent another cause of bias as patients who  
49 do not complete longer-term assessments may have poorer outcomes [51, 52]. In this review,  
50 six studies had data on <80% participants at follow-up. The methodological quality of five  
51  
52  
53  
54  
55  
56  
57  
58  
59  
60

1  
2  
3 studies was limited by the lack of multivariable analysis to minimize the impact of potential  
4 confounding on results. In studies with no risk of bias other than patient selection, there was a  
5 suggestion that chronic pain was associated with increased acute post-operative pain during  
6 the hospital stay [43, 45]. However, in one of these studies, a comprehensive assessment of  
7 pain relationships over time suggested that the association was largely explained by pre-  
8 operative pain [43]. For later pain assessments, one study did not identify consistent  
9 associations between post-operative pain and chronic pain [34].  
10

11  
12  
13  
14  
15 This review has strengths and weakness which should be considered when interpreting the  
16 results. While our search terms were broad to identify cohort studies which involved patients  
17 with TKR, three studies were identified through methods other than the main searches. This  
18 is a recognized issue in identification of observational studies [53] and highlights the  
19 importance in bibliographic databases of appropriate indexing and use of keywords. It is  
20 possible that studies including general orthopaedic or surgical populations may have included  
21 patients with TKR, and these may not have been identified. However, when these studies  
22 were identified, we contacted authors and data for patients with TKR were provided for two  
23 studies [41, 47]. The primary outcome of interest in this review was pain at six months or  
24 longer after TKR, and therefore we did not include studies that used a composite pain and  
25 function measure to assess outcome, for example the total Oxford Knee Score [54] or  
26 WOMAC [48]. This is because when such composite measures are reported without any  
27 separation of pain from function it is not possible to use the scores to assess pain *per se*. Pre-  
28 operative risk factors for post-operative pain and functional limitations are different [18, 55],  
29 and therefore it is important to assess pain and function as distinct outcomes. Separate pain  
30 and function scores can be calculated for the most commonly used patient-reported outcome  
31 measures, the WOMAC [56] and the Oxford Knee Score [57], and future studies would  
32 benefit from analyzing these outcomes separately. Research on post-operative risk factors is  
33 limited by heterogeneity in the assessment of risk factors and outcomes. If greater  
34 standardization could be achieved, such as through the implementation of core outcome sets  
35 [29], future systematic reviews may be able to pool data in meta-analysis to provide evidence  
36 for post-operative patient-related risk factors for chronic pain after TKR.  
37  
38  
39  
40  
41  
42  
43  
44  
45  
46  
47  
48  
49  
50  
51

52  
53 Much of the research evaluating risk factors for outcomes after TKR has focused on the pre-  
54 operative period rather than the period after surgery [12]. Numerous pre-operative patient-  
55 related factors and their association to chronic pain have been evaluated, including knee pain  
56 severity and duration, pain at other sites, comorbidities, function, depression, social support,  
57  
58  
59  
60

1  
2  
3 anxiety, fear of movement, pessimism and quality of life [12]. In comparison, our review  
4 found that the current extent of research into post-operative risk factors is narrow, and further  
5 research is needed. Assessing potential post-operative risk factors is important as some  
6 factors may be more associated with outcome when measured in the post-operative, rather  
7 than the pre-operative period [58]. Prediction of chronic post-surgical pain has been found to  
8 be strongest when assessing both pre-operative and post-operative risk factors [20]. Factors  
9 specific to the post-operative recovery period, such as acute post-operative pain, and factors  
10 which span the peri-operative period, such as anxiety, have the potential to influence  
11 outcomes. Identification of both pre-operative and post-operative risk factors could inform  
12 the development of comprehensive care packages to improve outcomes.  
13  
14  
15  
16  
17  
18  
19

20 Despite the lack of sufficient evidence about post-operative risk factors, research has  
21 evaluated whether early post-operative interventions improve longer-term outcomes after  
22 TKR. The long-term effects of pharmacological interventions to reduce pain severity in the  
23 early post-operative period have been evaluated, both in patients undergoing TKR and other  
24 surgical procedures [21, 22]. While effective at reducing acute post-operative pain, numerous  
25 peri-operative pharmacotherapies are not effective at preventing chronic post-surgical pain.  
26 Similarly, outpatient physiotherapy interventions to improve early post-operative function  
27 have little effect on long-term pain [23, 24]. This may be because acute post-operative pain  
28 and functional limitations are not risk factors for chronic pain after TKR or it may be that  
29 these interventions require evaluation in trials that are focused on high risk patients.  
30 However, before evaluation of such stratified models of care is possible, more research is  
31 needed to identify post-operative patient-related risk factors for chronic pain after TKR.  
32  
33  
34  
35  
36  
37  
38  
39  
40

41 In conclusion, this systematic review found insufficient evidence to draw conclusions about  
42 the association between any post-operative patient-related factor and chronic pain after TKR.  
43 Further high-quality research is required to provide a robust evidence on post-operative risk  
44 factors, and inform the development and evaluation of targeted interventions to optimize  
45 patients' outcomes after TKR.  
46  
47  
48  
49  
50  
51  
52  
53  
54  
55  
56  
57  
58  
59  
60



### **Acknowledgements**

We would like to thank all the study authors who took the time to reply to our requests for further clarification or additional data.

### **Author contributions**

All authors contributed to the concept and design of the study. ADB, JD and VW contributed to the acquisition and analysis of data. VW drafted the article and ADB, JD and RGH revised it critically for important intellectual content. VW and ADB take responsibility for the integrity of the work as a whole, from inception to finished article.

### **Funding**

This article presents independent research funded by the National Institute for Health Research (NIHR) under its Programme Grants for Applied Research programme (RP-PG-0613-20001). The views expressed are those of the authors and not necessarily those of the NHS, the NIHR or the Department of Health. The funder had no role in the study design, collection, analysis and interpretation of data; in the writing of the manuscript; or in the decision to submit the manuscript for publication.

### **Competing interests**

The authors have no conflicts of interest to declare.

### **Data sharing statement**

No additional data are available.

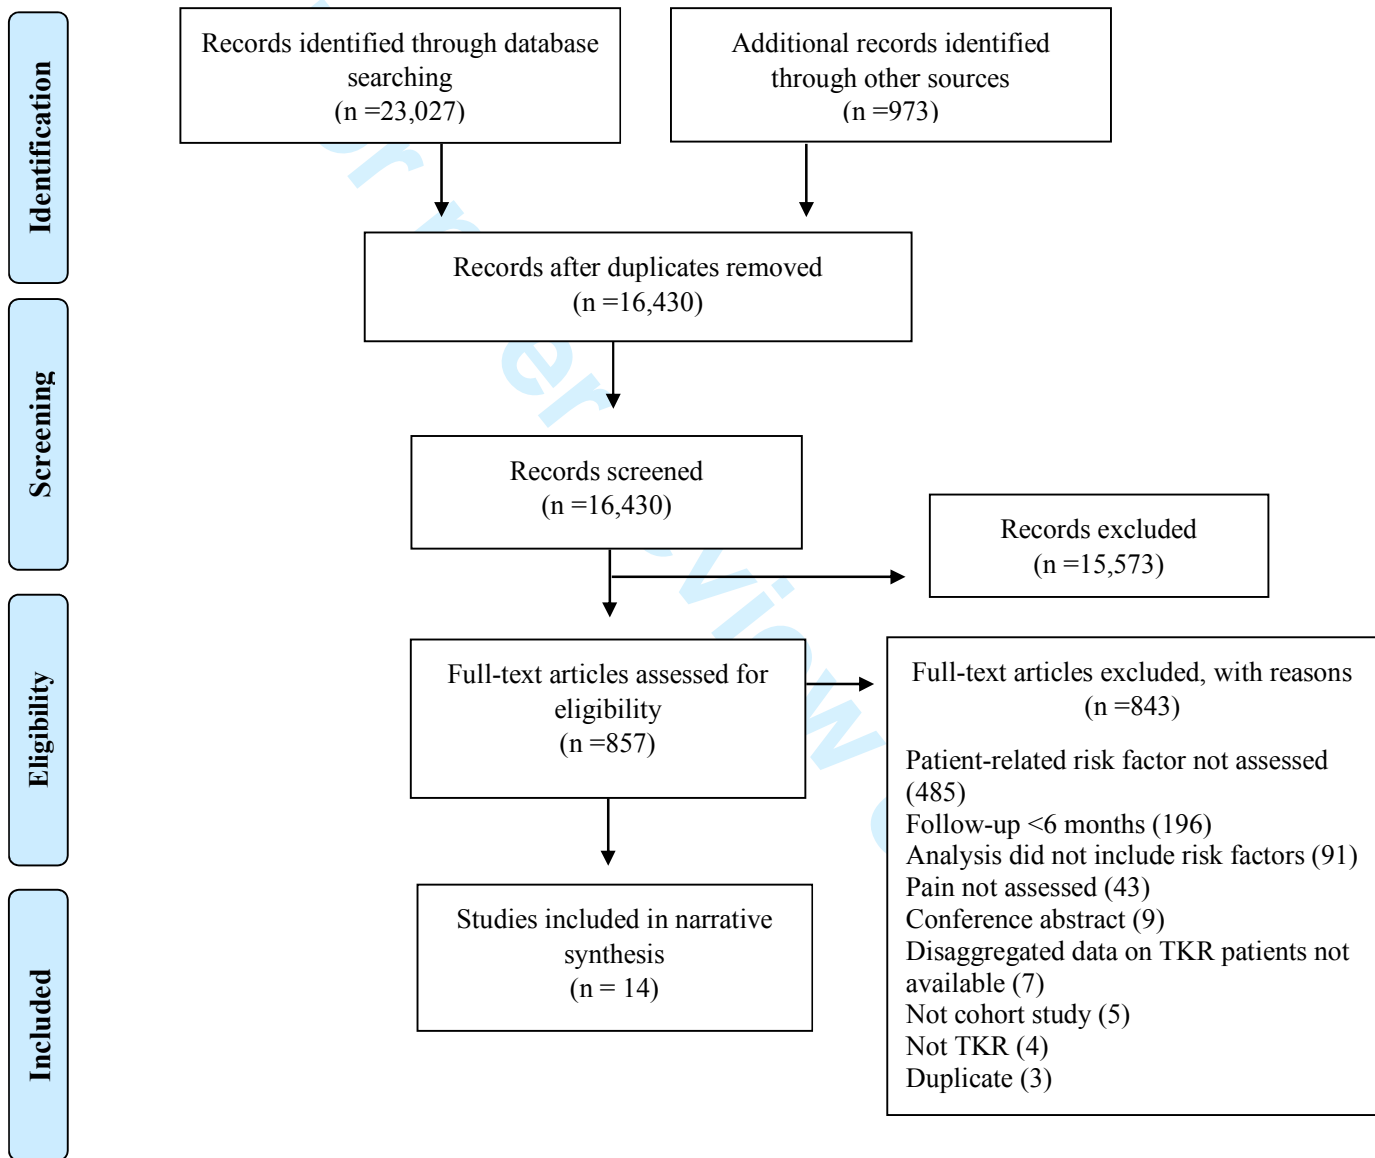

Figure 1: Systematic review flow diagram

Table 1: Characteristics of included studies

| Study                 | Dates of baseline data collection | Study design | Country   | Participants recruited/at final follow-up | Mean/median age | % female      | Outcome measure         | Duration of follow-up |
|-----------------------|-----------------------------------|--------------|-----------|-------------------------------------------|-----------------|---------------|-------------------------|-----------------------|
| Crosbie (2010)[34]    | 2005-2006                         | Cohort*      | Australia | 102/100                                   | 68              | 56%           | WOMAC Pain              | 6 months              |
| Edwards (2009) [35]   | Not reported                      | Cohort       | USA       | 43 in analysis                            | 72              | 58%           | VAS                     | 12 months             |
| Elson (2006) [36]     | 1995-1998                         | Case control | UK        | 622/402 knees                             | 69              | 54%           | AKSS pain question      | 5 years               |
| Grosu (2016) [37]     | 2009-2010                         | Cohort       | Belgium   | 114/68                                    | 66              | 66%           | Verbal descriptor scale | 12 months             |
| Nunez (2007) [38]     | 2000-2001                         | Cohort       | Spain     | 88/67                                     | 75              | 81%           | WOMAC Pain              | 3 years               |
| Nunez (2009) [39]     | 2000                              | Cohort       | Spain     | 142/112                                   | 67              | 77%           | WOMAC Pain              | 7 years               |
| Phillips (2014) [40]  | 2009-2010                         | Cohort       | UK        | 96/80                                     | 71              | 56%           | VAS                     | 39-51 months          |
| Pinto (2013) [41]     | 2009-2011                         | Cohort       | Portugal  | 42 in analysis                            | 66              | 77%           | NRS                     | 4-6 months            |
| Riis (2014) [42]      | 2007-2009                         | Cohort       | Denmark   | 176 /154                                  | 68              | 65%           | AKSS pain question      | 12 months             |
| Sayers (2016) [43]    | 2009-2012                         | Cohort*      | UK        | 316/277                                   | 69              | 53%           | WOMAC Pain              | 12 months             |
| Stephens (2002) [44]  | Not reported                      | Cohort       | USA       | 71/63                                     | 67              | 54%           | WOMAC Pain              | 6 months              |
| Thomazeau (2016) [45] | 2013                              | Cohort       | France    | 109/104                                   | 69              | 72%           | NRS                     | 6 months              |
| Kocic (2015) [46]     | 2007-2013                         | Cohort       | Serbia    | 78/78                                     | 68              | 76%           | NRS                     | 6 months              |
| Veal (2015) [47]      | 2013                              | Cohort       | Australia | 23 in analysis                            | Not available   | Not available | Verbal descriptor scale | 12 months             |

\*RCT analysed as cohort

**Table 2: Ratings of methodological quality for included studies**

| Study                          | Inclusion of consecutive patients | Representativeness (multi-center adequate) | Percent follow-up (>80% adequate) | Minimization of potential confounding (multivariable analysis adequate) |
|--------------------------------|-----------------------------------|--------------------------------------------|-----------------------------------|-------------------------------------------------------------------------|
| Crosbie (2010)[34]             | +                                 | -                                          | +                                 | +                                                                       |
| Edwards (2009) [35]            |                                   | -                                          | -                                 | +                                                                       |
| Elson (2006) [36]              |                                   | -                                          | -                                 | -                                                                       |
| Grosu (2016) [37]              |                                   | -                                          | -                                 | -                                                                       |
| Nunez (2007) [38]              | +                                 | -                                          | -                                 | +                                                                       |
| Nunez (2009) [39]              | +                                 | -                                          | -                                 | +                                                                       |
| Phillips (2014) [40]           | +                                 | -                                          | +                                 | -                                                                       |
| Pinto <sup>1</sup> (2013) [41] | +                                 | -                                          | -                                 | +                                                                       |
| Riis (2014) [42]               | +                                 | -                                          | +                                 | +                                                                       |
| Sayers (2016) [43]             | + <sup>2</sup>                    | -                                          | +                                 | +                                                                       |
| Stephens (2002) [44]           |                                   |                                            | +                                 | +                                                                       |
| Thomazeau (2016) [45]          | +                                 | -                                          | +                                 | +                                                                       |
| Kocic (2015) [46]              |                                   | -                                          | +                                 | -                                                                       |
| Veal <sup>1</sup> (2015) [47]  |                                   | -                                          | +                                 | -                                                                       |

‘+’ adequate, ‘-’ inadequate, ‘blank’ not reported

<sup>1</sup>For studies which authors provided data on patients with TKR, ratings are based on the study as reported in the article; <sup>2</sup> Information obtained through personal contact.

1  
2  
3  
4  
5  
6  
7  
8  
9  
10  
11  
12  
13  
14  
15  
16  
17  
18  
19  
20  
21  
22  
23  
24  
25  
26  
27  
28  
29  
30  
31  
32  
33  
34  
35  
36  
37  
38  
39  
40  
41  
42  
43  
44  
45  
46  
47  
48  
49

**Table 3: Studies evaluating acute post-operative knee pain as a risk factor for chronic pain after TKR**

| Author and date    | Number in analysis | Risk factor measurement                             | Outcome(s)                                            | Univariable or multivariable analysis                                                              | Association | Results summary                                                                                                                                                                                                        |
|--------------------|--------------------|-----------------------------------------------------|-------------------------------------------------------|----------------------------------------------------------------------------------------------------|-------------|------------------------------------------------------------------------------------------------------------------------------------------------------------------------------------------------------------------------|
| Edwards 2009 [35]  | 43                 | Global pain VAS at 1 month and 3 months             | Global pain VAS at 6 and 12 months                    | Multivariable generalized estimating equation model                                                | Yes         | Global pain at a previous time point was a predictor of global pain at a future time point (estimate=0.43, SE=0.08, t=5.8, p<0.001)                                                                                    |
|                    |                    | Night pain VAS at 1 month and 3 months              | Night pain VAS at 6 and 12 months                     |                                                                                                    | Yes         | Night pain at a previous time point was a predictor of night pain at a future time point (estimate=0.32, SE=0.08, t=3.8, p<0.001)                                                                                      |
| Crosbie 2010 [34]  | 100                | WOMAC Pain Scale at 2 weeks                         | WOMAC Pain scale at 6 months                          | Multivariable linear regression                                                                    | No          | Not significant, results not reported                                                                                                                                                                                  |
|                    |                    | VAS at 2 weeks                                      |                                                       |                                                                                                    | No          | Not significant, results not reported                                                                                                                                                                                  |
|                    |                    | WOMAC Pain at 8 weeks                               |                                                       |                                                                                                    | Yes         | Beta coefficient = +0.25 ± 0.07                                                                                                                                                                                        |
|                    |                    | VAS at 8 weeks                                      |                                                       |                                                                                                    | No          | Not significant, results not reported                                                                                                                                                                                  |
| Pinto 2013 [41]    | 42                 | NRS at 48 hours                                     | NRS at 4-6 months                                     | Hierarchical logistic regression                                                                   | No          | Exp(B) =0.998 (95% CI 0.623-1.601), p value=0.995                                                                                                                                                                      |
| Phillips 2014 [40] | 80                 | PainDETECT at 6 weeks                               | Pain VAS at 39-51 months                              | Univariable correlation                                                                            | Yes         | PainDETECT at 6 weeks correlated moderately with VAS pain scores (r=0.53)                                                                                                                                              |
| Veal 2015 [47]     | 23                 | Verbal descriptor scale for average pain at 10 days | Verbal descriptor scale for average pain at 12 months | N/A – statistical analysis inappropriate as data provided by authors on a small subset of patients | N/A         | 11 patients had none/mild pain at 10 days, none of these patients had severe/moderate pain at 12 months.<br><br>12 patients had moderate/severe pain at 10 days, 2 of these patients had moderate/severe at 12 months. |

|                 |    |                                                                                        |                                                       |                         |     |                                                                                                         |
|-----------------|----|----------------------------------------------------------------------------------------|-------------------------------------------------------|-------------------------|-----|---------------------------------------------------------------------------------------------------------|
|                 |    | Verbal descriptor scale for worst pain at 10 days                                      | Verbal descriptor scale for worse pain at 12 months   |                         |     | 2 patients had none/mild pain at 10 days, none of these patients had severe/moderate pain at 12 months. |
|                 |    | Verbal descriptor scale for average pain at 6 week                                     | Verbal descriptor scale for average pain at 12 months |                         |     | 21 patients had moderate/severe pain at 10 days, 8 of these patients had moderate/severe at 12 months.  |
|                 |    | Verbal descriptor scale for worst pain at 6 weeks                                      | Verbal descriptor scale for worse pain at 12 months   |                         |     | 17 patients had none/mild pain at 6 weeks, 1 of these patients had moderate/severe pain at 12 months.   |
|                 |    |                                                                                        |                                                       |                         |     | 6 patients had moderate/severe pain at 6 weeks, 1 of these patients had moderate/severe at 12 months.   |
|                 |    |                                                                                        |                                                       |                         |     | 9 patients had none/mild pain at 6 weeks, 1 of these patients had severe/moderate pain at 12 months.    |
|                 |    |                                                                                        |                                                       |                         |     | 14 patients had moderate/severe pain at 6 weeks, 7 of these patients had moderate/severe at 12 months.  |
| Grosu 2016 [37] | 68 | Verbal descriptor scale on days 1,2 and 3 (cumulative value of maximal pain intensity) | Verbal descriptor scale at 6 months                   | Univariable correlation | Yes | r=0.350; p value = 0.009                                                                                |
|                 |    |                                                                                        | Verbal descriptor scale at 12 months                  |                         | Yes | r=0.350; p value = 0.009                                                                                |
|                 |    | Verbal descriptor scale on day 8                                                       | Verbal descriptor scale at 6 months                   |                         | No  | Not significant, results not reported                                                                   |
|                 |    |                                                                                        | Verbal descriptor scale at 12 months                  |                         | No  | Not significant, results not reported                                                                   |

|                     |     |                                                      |                                      |                                             |     |                                                                                                                                                                                                                                                       |
|---------------------|-----|------------------------------------------------------|--------------------------------------|---------------------------------------------|-----|-------------------------------------------------------------------------------------------------------------------------------------------------------------------------------------------------------------------------------------------------------|
|                     |     | Verbal descriptor scale on day 30                    | Verbal descriptor scale at 6 months  |                                             | Yes | r=0.310, p=0.013                                                                                                                                                                                                                                      |
|                     |     |                                                      | Verbal descriptor scale at 12 months |                                             | No  | Not significant, results not reported                                                                                                                                                                                                                 |
|                     |     | Verbal descriptor scale at 3 months                  | Verbal descriptor scale at 6 months  |                                             | No  | Not significant, results not reported                                                                                                                                                                                                                 |
|                     |     |                                                      | Verbal descriptor scale at 12 months |                                             | No  | Not significant, results not reported                                                                                                                                                                                                                 |
| Sayers 2016 [43]    | 277 | VAS for pain on rest on days 1,2 and 3 (combined)    | WOMAC Pain at 12 months              | Multivariable structural equation modelling | Yes | Beta=0.222, SE=0.058, 95% CI = 0.109, 0.336, p value = 0.0001<br><br>When pre-operative pain added: Beta=0.09, 95% CI = -0.09, 0.27, p value = 0.332                                                                                                  |
|                     |     | VAS for pain on movement on days 1,2 and 3(combined) |                                      |                                             | Yes | Beta=0.140, SE=0.044, 95% CI = 0.054, 0.226, p value = 0.0014<br><br>When pre-operative pain added: Beta=0.00, 95% CI = -0.14, 0.15, p value = 0.955                                                                                                  |
| Thomazeau 2016 [45] | 104 | NRS on days 1-4                                      | NRS at 6 months                      | Multivariate logistic regression            | Yes | Patients with high intensity acute post-operative pain (defined though Latent Class Growth analysis) were more likely to have pain at 6 months than patients with low intensity acute post-operative pain (OR=4.23, 95% CI=1.39-12.88, p-value=0.011) |

Table 4: Studies evaluating post-operative knee function as a risk factor for chronic pain after TKR

| Author and date             | Number in analysis | Risk factor measurement                                    | Outcome                | Univariable or multivariable analysis    | Association | Results summary                        |
|-----------------------------|--------------------|------------------------------------------------------------|------------------------|------------------------------------------|-------------|----------------------------------------|
| Elson and Brenkel 2006 [36] | 402 knees          | Range of motion (active and passive) at hospital discharge | AKSS Pain at 5 years   | Univariable analysis                     | No          | Not significant, results not reported  |
| Nunez 2007 [38]             | 67                 | Ambulatory status at hospital discharge                    | WOMAC Pain at 3 years  | Multivariable linear regression          | No          | Not significant, results not reported  |
| Nunez 2009 [39]             | 112                | Ambulatory status at hospital discharge                    | WOMAC Pain at 7 years  | Multivariable linear regression          | No          | Not significant, results not reported  |
| Crosbie 2010 [34]           | 100                | WOMAC Function at 2 weeks                                  | WOMAC Pain at 6 months | Multivariable linear regression          | Yes         | Beta coefficient = +0.06, SE = ± 0.02. |
|                             |                    | 6 minute walk test at 2 weeks                              |                        |                                          | Yes         | Beta coefficient = -0.05, SE = ± 0.01. |
|                             |                    | Stair ascent speed at 2 weeks                              |                        |                                          | No          | Not significant, results not reported  |
|                             |                    | WOMAC Function at 8 weeks                                  |                        |                                          | No          | Not significant, results not reported  |
|                             |                    | 6 minute walk test at 8 weeks                              |                        |                                          | Yes         | Beta coefficient = -0.04, SE = ± 0.01. |
| Riis 2014 [42]              | 154                | Range of flexion (active) at hospital discharge            | AKSS Pain at 12 months | Multivariable binary logistic regression | No          | OR 1.00 (95% CI 0.99 to 1.04), p=0.698 |



1  
2  
3  
4  
5  
6  
7  
8  
9  
10  
11  
12  
13  
14  
15  
16  
17  
18  
19  
20  
21  
22  
23  
24  
25  
26  
27  
28  
29  
30  
31  
32  
33  
34  
35  
36  
37  
38  
39  
40  
41  
42  
43  
44  
45  
46  
47  
48  
49

**Table 5: Studies evaluating post-operative psychological factors as risk factors for chronic pain after TKR**

| Author and date    | Number in analysis | Risk factor measurement                                                                              | Outcome(s)                         | Univariable or multivariable analysis               | Association | Results summary                                                                                                                          |
|--------------------|--------------------|------------------------------------------------------------------------------------------------------|------------------------------------|-----------------------------------------------------|-------------|------------------------------------------------------------------------------------------------------------------------------------------|
| Stephens 2002 [44] | 63                 | Perceived positive social support (MOS Social Support survey) at 6 weeks                             | WOMAC Pain at 6 months             | Multivariable hierarchical multiple regression      | Yes         | Beta=-0.29, SE=0.09, p≤0.05                                                                                                              |
|                    |                    | Perceived negative social support (4 items) at 6 weeks                                               |                                    |                                                     | Yes         | Beta=-0.27, SE=0.14, p≤0.05                                                                                                              |
|                    |                    | Active coping (Vanderbilt Multidimensional Pain Coping Inventory Active Coping scale) at 6 weeks     |                                    |                                                     | No          | Beta=-0.14, SE=0.01                                                                                                                      |
|                    |                    | Avoidant coping (Vanderbilt Multidimensional Pain Coping Inventory Avoidant Coping scale) at 6 weeks |                                    |                                                     | No          | Beta=0.21, SE=0.01                                                                                                                       |
| Edwards 2009 [35]  | 43                 | Catastrophizing (Coping Strategies Questionnaire catastrophizing subscale) at 1 month and 3 months   | Global pain VAS at 6 and 12 months | Multivariable generalized estimating equation model | No          | Catastrophizing at a previous time point was not a predictor of global pain at a future time point (estimate=2.1, SE=2.2, t=0.9, p=0.35) |
|                    |                    |                                                                                                      | Night pain VAS at 6 and 12 months  |                                                     | Yes         | Catastrophizing at a previous time was a predictor of nighttime pain at a future time point (estimate=5.1, SE=2.5, t=2.0, p=0.04).       |
|                    |                    | Depression (Centre for Epidemiological Studies Depression Scale at 1 month and 3 months)             | Global pain VAS at 6 and 12 months |                                                     | Yes         | Depression at a previous time point was a predictor of global pain at a future time point (estimate=0.67, SE=0.30, t=2.2, p=0.03)        |

|                 |    |                                                                   |                                   |                                  |     |                                                                                                                                              |
|-----------------|----|-------------------------------------------------------------------|-----------------------------------|----------------------------------|-----|----------------------------------------------------------------------------------------------------------------------------------------------|
|                 |    |                                                                   | Night pain VAS at 6 and 12 months |                                  | No  | Depression at a previous time point was not a predictor of nighttime pain at a future time point (estimate=0.40, SE=0.33, t=1.2, p=0.24).    |
| Pinto 2013 [41] | 42 | Anxiety scale (Hospital Anxiety and Depression Scale) at 48 hours | NRS at 4-6 months                 | Hierarchical logistic regression | Yes | Exp(B) = 1.713 (95% CI 1.104-2.657), p value=0.016                                                                                           |
| Kocic 2015 [46] | 78 | Fear of movement (Tampa Scale of Kinesiophobia) at 2 weeks        | NRS at 6 months                   | Univariable comparison of means  | Yes | Patients with high fear of movement had more pain (mean=3.24, SD=1.98) than patients with low fear of movement (mean=1.81, SD=1.5), p=0.0035 |

## References

1. National Joint Registry for England W, Northern Ireland and the Isle of Man. 13th Annual Report Hemel Hempstead: NJR Centre.2016.
2. Scottish Arthroplasty Project. Biennial report NHS National Services Scotland2016.
3. Maradit Kremers H, Larson DR, Crowson CS, Kremers WK, Washington RE, Steiner CA, et al. Prevalence of Total Hip and Knee Replacement in the United States. *J Bone Joint Surg Am* 2015; 97: 1386-1397.
4. Scott CE, Bugler KE, Clement ND, MacDonald D, Howie CR, Biant LC. Patient expectations of arthroplasty of the hip and knee. *J Bone Joint Surg Br* 2012; 94: 974-981.
5. Beswick AD, Wylde V, Goberman-Hill R, Blom A, Dieppe P. What proportion of patients report long-term pain after total hip or knee replacement for osteoarthritis? A systematic review of prospective studies in unselected patients. *BMJ Open* 2012; 2: e000435.
6. Wylde V, Hewlett S, Learmonth ID, Dieppe P. Persistent pain after joint replacement: Prevalence, sensory qualities, and postoperative determinants. *Pain* 2011; 152: 566-572.
7. Werner MU, Kongsgaard UE. I. Defining persistent post-surgical pain: is an update required? *Br J Anaesth* 2014; 113: 1-4.
8. Jeffery AE, Wylde V, Blom AW, Horwood JP. "It's there and I'm stuck with it": patients' experiences of chronic pain following total knee replacement surgery. *Arthritis Care Res (Hoboken)* 2011; 63: 286-292.
9. Wylde V, Mackichan, Dixon S, Goberman-Hill R. Service provision for patients with chronic post-surgical pain after total knee replacement: An evaluation of current practice. *Journal of Pain Management* 2014; 7: 147-154.
10. MacKichan F, Wylde V, Goberman-Hill R. Pathways Through Care for Long-Term Pain After Knee Replacement: A Qualitative Study With Healthcare Professionals. *Musculoskeletal Care* 2015.
11. Beswick AD, Wylde V, Goberman-Hill R. Interventions for the prediction and management of chronic postsurgical pain after total knee replacement: systematic review of randomised controlled trials. *BMJ Open* 2015; 5: e007387.

12. Lewis GN, Rice DA, McNair PJ, Kluger M. Predictors of persistent pain after total knee arthroplasty: a systematic review and meta-analysis. *British Journal of Anaesthesia* 2015; 114: 551-561.
13. Baert IA, Lluch E, Mulder T, Nijs J, Noten S, Meeus M. Does pre-surgical central modulation of pain influence outcome after total knee replacement? A systematic review. *Osteoarthritis Cartilage* 2016; 24: 213-223.
14. Hernandez C, Diaz-Heredia J, Berraquero ML, Crespo P, Loza E, Ruiz Iban MA. Pre-operative Predictive Factors of Post-operative Pain in Patients With Hip or Knee Arthroplasty: A Systematic Review. *Reumatol Clin* 2015; 11: 361-380.
15. Blom AW, Artz N, Beswick AD, Burston A, Dieppe P, Elvers KT, et al. Improving patients' experience and outcome of total joint replacement: the RESTORE programme. In: NIHR Journals Library Southampton (UK)2016.
16. Birch S, Stilling M, Mechlenburg I, Hansen TB. Effectiveness of a physiotherapist delivered cognitive-behavioral patient education for patients who undergoes operation for total knee arthroplasty: a protocol of a randomized controlled trial. *BMC Musculoskelet Disord* 2017; 18: 116.
17. Riddle DL, Keefe FJ, Ang D, J K, Dumenci L, Jensen MP, et al. A phase III randomized three-arm trial of physical therapist delivered pain coping skills training for patients with total knee arthroplasty: the KASTPain protocol. *BMC Musculoskelet Disord* 2012; 13: 149.
18. Judge A, Arden NK, Cooper C, Kassim Javaid M, Carr AJ, Field RE, et al. Predictors of outcomes of total knee replacement surgery. *Rheumatology (Oxford, England)* 2012; 51: 1804-1813.
19. Macrae WA. Chronic post-surgical pain: 10 years on. *Br J Anaesth* 2008; 101: 77-86.
20. Althaus A, Hinrichs-Rocker A, Chapman R, Arranz Becker O, Lefering R, Simanski C, et al. Development of a risk index for the prediction of chronic post-surgical pain. *Eur J Pain* 2012; 16: 901-910.
21. Wylde V, Lenguerrand E, Gooberman-Hill R, Beswick AD, Marques E, Noble S, et al. Effect of local anaesthetic infiltration on chronic postsurgical pain after total hip and knee replacement: the APEX randomised controlled trials. *Pain* 2015; 156: 1161-1170.
22. Chaparro LE, Smith SA, Moore RA, Wiffen PJ, Gilron I. Pharmacotherapy for the prevention of chronic pain after surgery in adults. *Cochrane Database Syst Rev* 2013: CD008307.

- 1  
2  
3 23. Artz N, Elvers KT, Lowe CM, Sackley C, Jepson P, Beswick AD. Effectiveness of  
4 physiotherapy exercise following total knee replacement: systematic review and meta-  
5 analysis. *BMC Musculoskelet Disord* 2015; 16: 15.  
6  
7  
8 24. Fransen M, Nairn L, Bridgett L, Crosbie J, March L, Parker D, et al. Post-Acute  
9 Rehabilitation After Total Knee Replacement: A Multicenter Randomized Clinical  
10 Trial Comparing Long-Term Outcomes. *Arthritis Care Res (Hoboken)* 2017; 69: 192-  
11 200.  
12  
13 25. Moher D, Liberati A, Tetzlaff J, Altman DG, Group P. Preferred reporting items for  
14 systematic reviews and meta-analyses: the PRISMA statement. *BMJ* 2009; 339:  
15 b2535.  
16  
17 26. Marcano Belisario J, Tudor Car L, Reeves T, Gunn L, Car J. Search strategies to  
18 identify observational studies in MEDLINE and EMBASE (Protocol). *Cochrane*  
19 *Database of Systematic Reviews* 2013: MR000041.  
20  
21 27. Scottish Intercollegiate Guidelines Network. Search filters.  
22 <http://www.sign.ac.uk/methodology/filters.html#obs> Accessed September 2016; Last  
23 updated on 23/01/17.  
24  
25 28. Higgins J, Green SE. *Cochrane Handbook for Systematic Reviews of Interventions*  
26 *Version 5.1.0 [updated March 2011]. The Cochrane Collaboration, 2011. Available*  
27 *from [www.cochrane-handbook.org](http://www.cochrane-handbook.org). 2011.*  
28  
29 29. Wylde V, Mackichan F, Bruce J, Gooberman-Hill R. Assessment of chronic post-  
30 surgical pain after knee replacement: Development of a core outcome set. *European*  
31 *Journal of Pain* 2015; 19: 611-620.  
32  
33 30. Slim K, Nini E, Forestier D, Kwiatkowski F, Panis Y, Chipponi J. Methodological  
34 index for non-randomized studies (minors): development and validation of a new  
35 instrument. *ANZ J Surg* 2003; 73: 712-716.  
36  
37 31. Wells G, Shea B, O'Connell D, Peterson J, Welch V, Losos M, et al. The Newcastle-  
38 Ottawa Scale (NOS) for assessing the quality if nonrandomized studies in meta-  
39 analyses. vol. 2017. Available from: URL:  
40 [http://www.ohri.ca/programs/clinical\\_epidemiology/oxford.asp](http://www.ohri.ca/programs/clinical_epidemiology/oxford.asp) 2014.  
41  
42 32. Sterne JA, Hernan MA, Reeves BC, Savovic J, Berkman ND, Viswanathan M, et al.  
43 ROBINS-I: a tool for assessing risk of bias in non-randomised studies of  
44 interventions. *BMJ* 2016; 355: i4919.  
45  
46 33. Juni P, Witschi A, Bloch R, Egger M. The hazards of scoring the quality of clinical  
47 trials for meta-analysis. *JAMA* 1999; 282: 1054-1060.  
48  
49  
50  
51  
52  
53  
54  
55  
56  
57  
58  
59  
60

- 1  
2  
3 34. Crosbie J, Naylor J, Harmer A, Russell T. Predictors of functional ambulation and  
4 patient perception following total knee replacement and short-term rehabilitation.  
5 Disability and rehabilitation 2010; 32: 1088-1098.  
6  
7  
8 35. Edwards RR, Haythornthwaite JA, Smith MT, Klick B, Katz JN. Catastrophizing and  
9 depressive symptoms as prospective predictors of outcomes following total knee  
10 replacement. Pain research & management 2009; 14: 307-311.  
11  
12 36. Elson DW, Brenkel IJ. Predicting pain after total knee arthroplasty. The Journal of  
13 arthroplasty 2006; 21: 1047-1053.  
14  
15 37. Grosu I, Thienpont E, Dekock M, Scholtes JL, Lavand'homme P. Dynamic view of  
16 postoperative pain evolution after total knee arthroplasty: A prospective observational  
17 study. Minerva Anestesiologica 2016; 82: 274-283.  
18  
19 38. Nunez M, Nunez E, Luis del Val J, Ortega R, Segur JM, Hernandez MV, et al.  
20 Health-related quality of life in patients with osteoarthritis after total knee  
21 replacement: Factors influencing outcomes at 36 months of follow-up. Osteoarthritis  
22 and Cartilage 2007; 15: 1001-1007.  
23  
24 39. Nunez M, Lozano L, Nunez E, Segur JM, Sastre S, Macule F, et al. Total knee  
25 replacement and health-related quality of life: factors influencing long-term outcomes.  
26 Arthritis and rheumatism 2009; 61: 1062-1069.  
27  
28 40. Phillips JRA, Hopwood B, Arthur C, Stroud R, Toms AD. The natural history of pain  
29 and neuropathic pain after knee replacement: a prospective cohort study of the point  
30 prevalence of pain and neuropathic pain to a minimum three-year follow-up. The  
31 bone & joint journal 2014; 96-B: 1227-1233.  
32  
33 41. Pinto PR, McIntyre T, Ferrero R, Almeida A, Araujo-Soares V. Risk factors for  
34 moderate and severe persistent pain in patients undergoing total knee and hip  
35 arthroplasty: a prospective predictive study. PloS one 2013; 8: e73917.  
36  
37 42. Riis A, Rathleff MS, Jensen MB, Simonsen O. Low grading of the severity of knee  
38 osteoarthritis pre-operatively is associated with a lower functional level after total  
39 knee replacement: a prospective cohort study with 12 months' follow-up. The bone &  
40 joint journal 2014; 96-B: 1498-1502.  
41  
42 43. Sayers A, Wyld V, Lenguerrand E, Beswick AD, Gooberman-Hill R, Pyke M, et al.  
43 Rest Pain and Movement-Evoked Pain as Unique Constructs in Hip and Knee  
44 Replacements. Arthritis Care Res (Hoboken) 2016; 68: 237-245.  
45  
46  
47  
48  
49  
50  
51  
52  
53  
54  
55  
56  
57  
58  
59  
60

- 1  
2  
3 44. Stephens MAP, Druley JA, Zautra AJ. Older adults' recovery from surgery for  
4 osteoarthritis of the knee: Psychosocial resources and constraints as predictors of  
5 outcomes. *Health Psychology* 2002; 21: 377-383.  
6  
7  
8 45. Thomazeau J, Rouquette A, Martinez V, Rabuel C, Prince N, Laplanche JL, et al.  
9 Predictive factors of chronic post-surgical pain at 6 months following knee  
10 replacement: Influence of postoperative pain trajectory and genetics. *Pain Physician*  
11 2016; 19: E729-E741.  
12  
13 46. Kocic M, Stankovic A, Lazovic M, Dimitrijevic L, Stankovic I, Spalevic M, et al.  
14 Influence of fear of movement on total knee arthroplasty outcome. *Annali Italiani Di*  
15 *Chirurgia* 2015; 86: 148-155.  
16  
17 47. Veal FC, Bereznicki LRE, Thompson AJ, Peterson GM, Orlikowski C. Subacute Pain  
18 as a Predictor of Long-Term Pain Following Orthopedic Surgery An Australian  
19 Prospective 12 Month Observational Cohort Study. *Medicine* 2015; 94.  
20  
21 48. Bellamy N, Buchanan WW, Goldsmith CH, Campbell J, Stitt LW. Validation study of  
22 WOMAC: a health status instrument for measuring clinically important patient  
23 relevant outcomes to antirheumatic drug therapy in patients with osteoarthritis of the  
24 hip or knee. *J Rheumatol* 1988; 15: 1833-1840.  
25  
26 49. Insall JN, Dorr LD, Scott RD, Scott WN. Rationale of the Knee Society clinical rating  
27 system. *Clinical Orthopaedics and Related Research* 1989: 13-14.  
28  
29 50. Bafeta A, Dechartres A, Trinquart L, Yavchitz A, Boutron I, Ravaud P. Impact of  
30 single centre status on estimates of intervention effects in trials with continuous  
31 outcomes: meta-epidemiological study. *BMJ* 2012; 344: e813.  
32  
33 51. Murray DW, Britton AR, Bulstrode CJK. Loss to follow-up matters. *J Bone Joint*  
34 *Surg Br* 1997; 79-B: 254-257.  
35  
36 52. Kim J, Lonner JH, Nelson CL, Lotke PA. Response Bias: Effect on Outcomes  
37 Evaluation by Mail Surveys after Total Knee Arthroplasty. *Journal of Bone and Joint*  
38 *Surgery - Series A* 2004; 86: 15-21.  
39  
40 53. Stroup DF, Berlin JA, Morton SC, Olkin I, Williamson GD, Rennie D, et al. Meta-  
41 analysis of observational studies in epidemiology: a proposal for reporting. Meta-  
42 analysis Of Observational Studies in Epidemiology (MOOSE) group. *JAMA* 2000;  
43 283: 2008-2012.  
44  
45 54. Dawson J, Fitzpatrick R, Murray D, Carr A. Questionnaire on the perceptions of  
46 patients about total knee replacement. *The Journal of bone and joint surgery. British*  
47 *volume* 1998; 80: 63-69.  
48  
49  
50  
51  
52  
53  
54  
55  
56  
57  
58  
59  
60

- 1  
2  
3 55. Lopez-Olivo MA, Landon GC, Siff SJ, Edelstein D, Pak C, Kallen MA, et al.  
4 Psychosocial determinants of outcomes in knee replacement. *Annals of the rheumatic*  
5 *diseases* 2011; 70: 1775-1781.  
6  
7  
8 56. Bellamy N. WOMAC: a 20-year experiential review of a patient-centered self-  
9 reported health status questionnaire. *J Rheumatol* 2002; 29: 2473-2476.  
10  
11 57. Harris K, Dawson J, Doll H, Field RE, Murray DW, Fitzpatrick R, et al. Can pain and  
12 function be distinguished in the Oxford Knee Score in a meaningful way? An  
13 exploratory and confirmatory factor analysis. *Quality of Life Research: An*  
14 *International Journal of Quality of Life Aspects of Treatment, Care & Rehabilitation*  
15 2013; 22: 2561-2568.  
16  
17  
18 58. van den Akker-Scheek I, Stevens M, Groothoff JW, Bulstra SK, Zijlstra W.  
19 Preoperative or postoperative self-efficacy: which is a better predictor of outcome  
20 after total hip or knee arthroplasty? *Patient education and counseling* 2007; 66: 92-99.  
21  
22  
23  
24  
25  
26  
27  
28  
29  
30  
31  
32  
33  
34  
35  
36  
37  
38  
39  
40  
41  
42  
43  
44  
45  
46  
47  
48  
49  
50  
51  
52  
53  
54  
55  
56  
57  
58  
59  
60



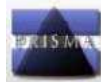

# PRISMA 2009 Checklist

| Section/topic                      | #  | Checklist item                                                                                                                                                                                                                                                                                              | Reported on page # |
|------------------------------------|----|-------------------------------------------------------------------------------------------------------------------------------------------------------------------------------------------------------------------------------------------------------------------------------------------------------------|--------------------|
| <b>TITLE</b>                       |    |                                                                                                                                                                                                                                                                                                             |                    |
| Title                              | 1  | Identify the report as a systematic review, meta-analysis, or both.                                                                                                                                                                                                                                         | 1                  |
| <b>ABSTRACT</b>                    |    |                                                                                                                                                                                                                                                                                                             |                    |
| Structured summary                 | 2  | Provide a structured summary including, as applicable: background; objectives; data sources; study eligibility criteria, participants, and interventions; study appraisal and synthesis methods; results; limitations; conclusions and implications of key findings; systematic review registration number. | 2                  |
| <b>INTRODUCTION</b>                |    |                                                                                                                                                                                                                                                                                                             |                    |
| Rationale                          | 3  | Describe the rationale for the review in the context of what is already known.                                                                                                                                                                                                                              | 3-4                |
| Objectives                         | 4  | Provide an explicit statement of questions being addressed with reference to participants, interventions, comparisons, outcomes, and study design (PICOS).                                                                                                                                                  | 3-4                |
| <b>METHODS</b>                     |    |                                                                                                                                                                                                                                                                                                             |                    |
| Protocol and registration          | 5  | Indicate if a review protocol exists, if and where it can be accessed (e.g., Web address), and, if available, provide registration information including registration number.                                                                                                                               | 4                  |
| Eligibility criteria               | 6  | Specify study characteristics (e.g., PICOS, length of follow-up) and report characteristics (e.g., years considered, language, publication status) used as criteria for eligibility, giving rationale.                                                                                                      | 4-5                |
| Information sources                | 7  | Describe all information sources (e.g., databases with dates of coverage, contact with study authors to identify additional studies) in the search and date last searched.                                                                                                                                  | 5                  |
| Search                             | 8  | Present full electronic search strategy for at least one database, including any limits used, such that it could be repeated.                                                                                                                                                                               | Appendix 3         |
| Study selection                    | 9  | State the process for selecting studies (i.e., screening, eligibility, included in systematic review, and, if applicable, included in the meta-analysis).                                                                                                                                                   | 5-6                |
| Data collection process            | 10 | Describe method of data extraction from reports (e.g., piloted forms, independently, in duplicate) and any processes for obtaining and confirming data from investigators.                                                                                                                                  | 5-6                |
| Data items                         | 11 | List and define all variables for which data were sought (e.g., PICOS, funding sources) and any assumptions and simplifications made.                                                                                                                                                                       | 5-6                |
| Risk of bias in individual studies | 12 | Describe methods used for assessing risk of bias of individual studies (including specification of whether this was done at the study or outcome level), and how this information is to be used in any data synthesis.                                                                                      | 6                  |
| Summary measures                   | 13 | State the principal summary measures (e.g., risk ratio, difference in means).                                                                                                                                                                                                                               | 7                  |
| Synthesis of results               | 14 | Describe the methods of handling data and combining results of studies, if done, including measures of consistency (e.g., $I^2$ for each meta-analysis)                                                                                                                                                     | 7                  |

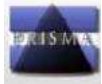

# PRISMA 2009 Checklist

Page 1 of 2

| Section/topic                 | #  | Checklist item                                                                                                                                                                                           | Reported on page # |
|-------------------------------|----|----------------------------------------------------------------------------------------------------------------------------------------------------------------------------------------------------------|--------------------|
| Risk of bias across studies   | 15 | Specify any assessment of risk of bias that may affect the cumulative evidence (e.g., publication bias, selective reporting within studies).                                                             | 6                  |
| Additional analyses           | 16 | Describe methods of additional analyses (e.g., sensitivity or subgroup analyses, meta-regression), if done, indicating which were pre-specified.                                                         | 7                  |
| <b>RESULTS</b>                |    |                                                                                                                                                                                                          |                    |
| Study selection               | 17 | Give numbers of studies screened, assessed for eligibility, and included in the review, with reasons for exclusions at each stage, ideally with a flow diagram.                                          | 7, Figure 1        |
| Study characteristics         | 18 | For each study, present characteristics for which data were extracted (e.g., study size, PICOS, follow-up period) and provide the citations.                                                             | 7-8, Table 1       |
| Risk of bias within studies   | 19 | Present data on risk of bias of each study and, if available, any outcome level assessment (see item 12).                                                                                                | 8, Table 2         |
| Results of individual studies | 20 | For all outcomes considered (benefits or harms), present, for each study: (a) simple summary data for each intervention group (b) effect estimates and confidence intervals, ideally with a forest plot. | Tables 3-5         |
| Synthesis of results          | 21 | Present results of each meta-analysis done, including confidence intervals and measures of consistency.                                                                                                  | N/A                |
| Risk of bias across studies   | 22 | Present results of any assessment of risk of bias across studies (see Item 15).                                                                                                                          | 8, Table 2         |
| Additional analysis           | 23 | Give results of additional analyses, if done (e.g., sensitivity or subgroup analyses, meta-regression [see Item 16]).                                                                                    | N/A                |
| <b>DISCUSSION</b>             |    |                                                                                                                                                                                                          |                    |
| Summary of evidence           | 24 | Summarize the main findings including the strength of evidence for each main outcome; consider their relevance to key groups (e.g., healthcare providers, users, and policy makers).                     | 11-13              |
| Limitations                   | 25 | Discuss limitations at study and outcome level (e.g., risk of bias), and at review-level (e.g., incomplete retrieval of identified research, reporting bias).                                            | 11-12              |
| Conclusions                   | 26 | Provide a general interpretation of the results in the context of other evidence, and implications for future research.                                                                                  | 12-13              |
| <b>FUNDING</b>                |    |                                                                                                                                                                                                          |                    |
| Funding                       | 27 | Describe sources of funding for the systematic review and other support (e.g., supply of data); role of funders for the systematic review.                                                               | 14                 |

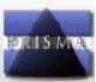

# PRISMA 2009 Checklist

- 1
- 2
- 3
- 4
- 5
- 6
- 7
- 8
- 9
- 10
- 11
- 12
- 13
- 14
- 15
- 16
- 17
- 18
- 19
- 20
- 21
- 22
- 23
- 24
- 25
- 26
- 27
- 28
- 29
- 30
- 31
- 32
- 33
- 34
- 35
- 36
- 37
- 38
- 39
- 40
- 41
- 42
- 43
- 44
- 45
- 46
- 47
- 48
- 49

For more information, visit: [www.prisma-statement.org](http://www.prisma-statement.org).

Page 2 of 2

For peer review only

## Appendix 2: Search terms

### MEDLINE (Ovid) (1946 to 17 October 2016)

- 1 Epidemiologic Studies/
- 2 exp Case-Control Studies/
- 3 exp Cohort Studies/
- 4 Cross-Sectional Studies/
- 5 (epidemiologic adj (study or studies)).ab,ti.
- 6 case control.ab,ti.
- 7 (cohort adj (study or studies)).ab,ti.
- 8 cross sectional.ab,ti.
- 9 cohort analy\$.ab,ti.
- 10 (follow up adj (study or studies)).ab,ti.
- 11 longitudinal.ab,ti.
- 12 retrospective\$.ab,ti.
- 13 prospective\$.ab,ti.
- 14 (observ\$ adj3 (study or studies)).ab,ti.
- 15 exp clinical study/
- 16 randomized controlled trial/
- 17 15 not 16
- 18 adverse effect?.ab,ti.
- 19 1 or 2 or 3 or 4 or 5 or 6 or 7 or 8 or 9 or 10 or 11 or 12 or 13 or 14 or 17 or 18
- 20 Arthroplasty, Replacement, Knee/
- 21 Knee Prosthesis/
- 22 (arthoplast\$ adj3 knee\$).mp. [mp=title, abstract, original title, name of substance word, subject heading word, keyword heading word, protocol supplementary concept word, rare disease supplementary concept word, unique identifier]
- 23 (knee\$ adj3 replac\$).mp. [mp=title, abstract, original title, name of substance word, subject heading word, keyword heading word, protocol supplementary concept word, rare disease supplementary concept word, unique identifier]

1  
2  
3 24 (knee adj3 implant\$.mp. [mp=title, abstract, original title, name of substance word,  
4 subject heading word, keyword heading word, protocol supplementary concept word, rare  
5 disease supplementary concept word, unique identifier]  
6

7 25 20 or 21 or 22 or 23 or 24  
8

9 26 19 and 25  
10

11  
12  
13 **EMBASE (Ovid) (1980 to 17 October 2016)**

14 1 Epidemiologic Studies/  
15

16 2 exp Case-Control Studies/  
17

18 3 exp Cohort Studies/  
19

20 4 Cross-Sectional Studies/  
21

22 5 (epidemiologic adj (study or studies)).ab,ti.  
23

24 6 case control.ab,ti.  
25

26 7 (cohort adj (study or studies)).ab,ti.  
27

28 8 cross sectional.ab,ti.  
29

30 9 cohort analy\$.ab,ti.  
31

32 10 (follow up adj (study or studies)).ab,ti.  
33

34 11 longitudinal.ab,ti.  
35

36 12 retrospective\$.ab,ti.  
37

38 13 prospective\$.ab,ti.  
39

40 14 (observ\$ adj3 (study or studies)).ab,ti.  
41

42 15 exp clinical study/  
43

44 16 randomized controlled trial/  
45

46 17 15 not 16  
47

48 18 adverse effect?.ab,ti.  
49

50 19 1 or 2 or 3 or 4 or 5 or 6 or 7 or 8 or 9 or 10 or 11 or 12 or 13 or 14 or 17 or 18  
51

52 20 Arthroplasty, Replacement, Knee/  
53

54 21 Knee Prosthesis/  
55

56 22 (arthoplast\$ adj3 knee\$.mp. [mp=title, abstract, original title, name of substance  
57 word, subject heading word, keyword heading word, protocol supplementary concept word,  
58 rare disease supplementary concept word, unique identifier]  
59  
60

1  
2  
3 23 (knee\$ adj3 replac\$).mp. [mp=title, abstract, original title, name of substance word,  
4 subject heading word, keyword heading word, protocol supplementary concept word, rare  
5 disease supplementary concept word, unique identifier]  
6

7 24 (knee adj3 implant\$).mp. [mp=title, abstract, original title, name of substance word,  
8 subject heading word, keyword heading word, protocol supplementary concept word, rare  
9 disease supplementary concept word, unique identifier]  
10

11 25 20 or 21 or 22 or 23 or 24  
12

13 26 19 and 25  
14  
15  
16

### 17 **PsycINFO (inception [1806] to 23 March 2016**

18 1. (knee\$ adj3 arthoplast\$).mp. [mp=title, abstract, heading word, table of contents, key  
19 concepts, original title, tests & measures]  
20

21 2. (knee\$ adj3 replac\$).mp. [mp=title, abstract, heading word, table of contents, key concepts,  
22 original title, tests & measures]  
23

24 3. (knee\$ adj3 surg\$).mp. [mp=title, abstract, heading word, table of contents, key concepts,  
25 original title, tests & measures]  
26

27 4. (knee\$ adj3 implant\$).mp. [mp=title, abstract, heading word, table of contents, key  
28 concepts, original title, tests & measures]  
29

30 5. (knee adj3 prosthesis\$).mp. [mp=title, abstract, heading word, table of contents, key  
31 concepts, original title, tests & measures]  
32

33 6. 1 or 2 or 3 or 4 or 5  
34  
35  
36  
37  
38  
39  
40  
41  
42  
43  
44  
45  
46  
47  
48  
49  
50  
51  
52  
53  
54  
55  
56  
57  
58  
59  
60

# BMJ Open

## Post-operative patient-related risk factors for chronic pain after total knee replacement: a systematic review

|                                 |                                                                                                                                                                                                                                                                                               |
|---------------------------------|-----------------------------------------------------------------------------------------------------------------------------------------------------------------------------------------------------------------------------------------------------------------------------------------------|
| Journal:                        | <i>BMJ Open</i>                                                                                                                                                                                                                                                                               |
| Manuscript ID                   | bmjopen-2017-018105.R1                                                                                                                                                                                                                                                                        |
| Article Type:                   | Research                                                                                                                                                                                                                                                                                      |
| Date Submitted by the Author:   | 24-Aug-2017                                                                                                                                                                                                                                                                                   |
| Complete List of Authors:       | Wylde, Vikki; University of Bristol, Musculoskeletal Research Unit<br>Beswick, Andrew; University of Bristol, School of Clinical Sciences<br>Dennis, Jane; University of Bristol, Musculoskeletal Research Unit<br>Goberman-Hill, Rachael; University of Bristol, School of Clinical Sciences |
| <b>Primary Subject Heading</b>: | Surgery                                                                                                                                                                                                                                                                                       |
| Secondary Subject Heading:      | Health services research                                                                                                                                                                                                                                                                      |
| Keywords:                       | Knee < ORTHOPAEDIC & TRAUMA SURGERY, systematic review, Chronic post-surgical pain, Risk factors                                                                                                                                                                                              |
|                                 |                                                                                                                                                                                                                                                                                               |

SCHOLARONE™  
Manuscripts

Peer Review Only

1  
2  
3 **Post-operative patient-related risk factors for chronic pain after total knee replacement:**  
4  
5 **a systematic review**  
6  
7  
8

9  
10 Wylde V, Beswick AD, Dennis J, Goberman-Hill R  
11

12 Musculoskeletal Research Unit, School of Clinical Sciences, University of Bristol, UK  
13  
14

15  
16  
17  
18  
19 **E-mail addresses**  
20

21 Vikki Wylde: v.wylde@bristol.ac.uk  
22

23  
24 Andrew Beswick: andy.beswick@bristol.ac.uk  
25

26  
27 Jane Dennis: jane.dennis@bristol.ac.uk  
28

29  
30 Rachael Goberman-Hill: r.goberman-hill@bristol.ac.uk  
31  
32

33  
34  
35 **Corresponding author**  
36

37 Vikki Wylde  
38

39  
40 Musculoskeletal Research Unit, Learning and Research Building, Southmead Hospital,  
41

42 Bristol, BS10 5NB, UK. Telephone: 0117 414 7878; E-mail: V.Wylde@bristol.ac.uk  
43  
44  
45

46  
47  
48 Running title: Risk factors for chronic pain after TKR  
49  
50  
51  
52  
53  
54  
55  
56  
57  
58  
59  
60



## ABSTRACT

### Objective

To identify post-operative patient-related risk factors for chronic pain after total knee replacement (TKR).

### Design

The systematic review protocol was registered on PROSPERO (CRD42016041374). MEDLINE, Embase and PsycINFO were searched from inception to October 2016 with no language restrictions. Key articles were also tracked in ISI Web of Science. Cohort studies evaluating the association between patient-related factors in the first three months post-operative and pain at six months or longer after primary TKR surgery were included. Screening, data extraction and assessment of methodological quality were undertaken by two reviewers. The primary outcome was pain severity in the replaced knee measured with a patient-reported outcome measure at six months or longer after TKR. Secondary outcomes included adverse events and other aspects of pain recommended by the core outcome set for chronic pain after TKR.

### Results

After removal of duplicates, 16,430 articles were screened, of which 805 were considered potentially relevant. After detailed evaluation of full-text articles, 14 studies with data from 1,168 participants were included. Post-operative patient-related factors included acute pain (eight studies), function (five studies) and psychosocial factors (four studies). The included studies had diverse methods for assessment of potential risk factors and outcomes and therefore narrative synthesis was conducted. For all post-operative factors, there was insufficient evidence to draw firm conclusions about the association with chronic pain after TKR. Selection bias was a potential risk for all studies, as none were reported to be conducted at multiple centres.

### Conclusion

This systematic review found insufficient evidence to draw firm conclusions about the association between any post-operative patient-related factors and chronic pain after TKR. Further high-quality research is required to provide a robust evidence base on post-operative

1  
2  
3 risk factors, and inform the development and evaluation of targeted interventions to optimise  
4 patients' outcomes after TKR.  
5  
6

7 **Key words:** Total knee replacement, post-operative risk factors, chronic pain, systematic  
8 review  
9

### 10 11 12 13 **Strengths and limitations of this study** 14

- 15 • This is the first systematic review of patient-related risk factors for chronic pain after  
16 total knee replacement.  
17
- 18 • Meta-analysis was not possible due to heterogeneity in the assessment of risk factors  
19 and outcomes.  
20
- 21 • We did not include studies that used a composite pain and function measure to assess  
22 outcome.  
23  
24  
25  
26  
27  
28  
29  
30  
31  
32  
33  
34  
35  
36  
37  
38  
39  
40  
41  
42  
43  
44  
45  
46  
47  
48  
49  
50  
51  
52  
53  
54  
55  
56  
57  
58  
59  
60

## INTRODUCTION

Primary total knee replacement (TKR) is a common operation, with over 100,000 operations performed in the UK in 2015 [1, 2] and demand is projected to increase dramatically [3]. Patients choose to have a TKR to relieve chronic pain and improve functional ability [4] but approximately 20% of patients experience chronic post-surgical pain [5, 6] defined as pain present at three months after surgery [7]. The impact of chronic pain after TKR is considerable and patients may struggle to cope and adjust to this pain [8]. Provision of services for patients with chronic pain after TKR are patchy and inconsistent [9], with a lack of explicit access points [10]. A systematic review identified that only one intervention has been evaluated for the management of this condition: a single intraarticular botulinum toxin injection [11].

The identification of risk factors for chronic pain after TKR is a fundamental step in designing interventions to improve patient outcomes. Understanding the relevance of non-modifiable factors, such as sex and ethnicity, can help patients and clinicians work together to make informed decisions about TKR. Although some factors may not be modifiable, others may be amenable to intervention. Identification of modifiable patient-related risk factors is an important element in the development of interventions to improve outcomes after TKR. Previous systematic reviews have synthesised the literature on pre-operative risk factors for chronic pain after TKR [12-15]. These reviews have found evidence for a range of modifiable pre-operative patient-related risk factors, including pain intensity, catastrophising, mental health and co-morbidities. Pre-operative interventions have largely focused on exercise and education and have shown little long-term post-operative benefit [15]. Further interventions specifically targeting pain-related behavior, such as cognitive-behavioral patient education and pain coping skills training, are being evaluated [16, 17].

While the potential value for pre-operatively identifying at risk patients and targeting them with appropriate interventions is clear, multivariable models have been found to have low predictive power, explaining less than 10% of the variability in chronic pain [18]. An operation itself is an important risk factor for chronic pain [19], and factors relating to the operation and early recovery may be important risk factors. A risk index including pre-surgical variables and acute post-surgical pain had “fair” predictive power for the development of chronic post-surgical pain across diverse surgery types [20]. Therefore, in addition to evaluating pre-operative risk factors, it is important to consider post-surgical factors that may limit rehabilitation and recovery, and be associated with chronic pain. If

1  
2  
3 patients at risk of developing chronic pain could be identified in the early post-operative  
4 period, targeted interventions could be delivered, potentially as part of a comprehensive peri-  
5 operative care package, to prevent the development of chronic pain. Although trials evaluating  
6 the effectiveness of early post-operative interventions on reducing chronic pain have been  
7 conducted [21-24], no systematic review has yet evaluated post-operative risk factors for  
8 chronic pain after TKR. Therefore, the aim of this systematic review was to identify early  
9 post-operative patient-related risk factors for chronic pain after TKR.  
10  
11  
12  
13  
14  
15  
16

## 17 **METHODS**

### 18 **Protocol and registration**

19  
20 The protocol was registered on the international prospective register of systematic reviews  
21 (PROSPERO) on 6<sup>th</sup> July 2016 (reference: CRD42016041374). Conduct and reporting of this  
22 systematic review adheres to recommendations from PRISMA [25](Appendix 1).  
23  
24  
25  
26  
27

### 28 **Eligibility criteria**

29 Studies were eligible for inclusion in the review if they met the following PICOS criteria:

30  
31 **Population:** Adults undergoing primary TKR predominantly for osteoarthritis. Studies that  
32 included TKR patients combined with patients undergoing other orthopaedic procedures were  
33 included if separate results were available for TKR patients.  
34  
35  
36

37  
38 **Exposure:** Post-operative patient-related risk factors measured in the first three months after  
39 surgery. Patients with exposure were those with a risk factor (categorical variable) or higher  
40 level of risk factor (continuous variable). The focus of this review was on patient-related risk  
41 factors with the potential for modification or use in targeting care, and therefore studies  
42 which assessed clinical risk factors (e.g. length of stay, post-operative complications, or  
43 radiographic measurements) or analgesic use were excluded.  
44  
45  
46  
47

48 **Comparator:** Patients with absence of risk factor (categorical variable) or lower level of risk  
49 factor (continuous variable).  
50  
51

52 **Outcome:** Severity of pain in the replaced knee measured with a patient-reported outcome  
53 measure at six months or longer after TKR surgery.  
54  
55

56 **Study design:** Cohort studies that have explored the relationships between factors measured  
57 in the first three months post-operative and longer-term pain outcomes.  
58  
59  
60

### Information sources and searches

MEDLINE, Embase and PsycINFO were searched from inception to 17<sup>th</sup> October 2016. Searches were conducted by experienced systematic reviewers (AB and JD) based on established design filters [26, 27]. The search strategy combined terms relating to study design (e.g. cohort, epidemiological study) and population (e.g. knee replacement, knee arthroplasty). Full search strategies are provided in Appendix 2. No language restrictions were applied. Searches were supplemented with hand searching of reference lists and review articles, and key articles were tracked in ISI Web of Science. Conference abstracts were excluded. ClinicalTrials.gov was searched on the 18<sup>th</sup> August 2017 for ongoing observational studies and records screened in duplicate by two reviewers (JD and VW).

### Study selection and data extraction

Bibliographic details of the articles identified were exported into EndNote X7 (Thomson Reuters) and duplicates removed. After an initial screening of titles and abstracts by one reviewer (AB) to remove clearly irrelevant studies, titles and abstracts were screened in duplicate by two reviewers (AB and VW). As recommended in the Cochrane Handbook [28], reviewers were 'over inclusive' at early stages and retained any potentially relevant studies. Full texts of all such reports were acquired and assessed for eligibility against the PICOS criteria in duplicate by two reviewers (AB and VW). Discrepancies were resolved in discussion with a third reviewer (JD). Data from articles that met the eligibility criteria were extracted into an Excel database by one reviewer (VW) with checking against source articles by a second reviewer (AB or JD). Extracted data comprised: country, date, setting, population, participant demographics, study methodology including statistical analysis, risk factors, time to follow-up, losses to follow-up, joint-specific pain outcomes, variables included in multivariable analyses and information relevant to assessment of study methodological quality.

Where necessary, authors of studies were contacted for further information to enable judgements about eligibility and/or to provide unpublished outcome data relevant to the review. If data from patients with TKR were combined with patients undergoing other orthopaedic procedures, separate data for patients with TKR were requested. If a combined pain and function outcome was reported, such as the Oxford Knee Score or WOMAC score,

1  
2  
3 separate pain-specific data were requested, e.g. the Oxford Knee Score pain subscale or  
4 WOMAC pain scale.  
5  
6

### 7 8 **Outcomes**

9  
10 The primary outcome was pain severity in the replaced knee measured with a patient-reported  
11 outcome measure at six months or longer after TKR. Chronic post-surgical pain is defined as  
12 pain present at three months after surgery [7], however research has shown that most of the  
13 improvement in pain occurs in the first 3-6 months after TKR surgery [29-32]. Therefore, six  
14 months post-operative was deemed an appropriate time point to assess chronic pain.  
15  
16

17  
18 Secondary outcomes included adverse events and other aspects of pain recommended by the  
19 core outcome set for chronic pain after TKR [33]. These included pain interference with daily  
20 living, pain and physical functioning, temporal aspects of pain, pain description, emotional  
21 aspects of pain, use of pain medication, and satisfaction with pain relief. No limits were  
22 placed on the tools used to measure these outcomes.  
23  
24  
25  
26  
27

### 28 **Assessment of methodological quality of included studies**

29  
30 The Newcastle-Ottawa quality assessment scale [34] and ROBINS-I tool [35] are established  
31 tools for the assessment of risk of bias in randomised controlled trials and studies reporting  
32 non-randomised controlled comparisons. However, risk of bias assessment in systematic  
33 reviews of observational studies is less well established. The MINORs tool [36] has been  
34 developed, however this is a summative checklist, and as such risks rating reporting rather  
35 than conduct [37]. Therefore we developed a non-summative checklist for use in this review.  
36  
37 This checklist consisted of four items to assess selection bias (inclusion of consecutive  
38 patients and representativeness), bias due to missing data (follow-up rates) and bias due to  
39 inadequate consideration of confounding (multivariable or univariable analysis). These items  
40 were informed by existing tools, including the MINORS, Newcastle-Ottawa quality  
41 assessment scale and the ROBINS-I tool. Each item was rated as adequate, not adequate or  
42 not reported. Each individual item rating is reported, rather than an overall score. Ratings of  
43 methodological quality for included studies were conducted independently by two reviewers  
44 (VW and JD) and any discrepancies were resolved in discussion with a third reviewer (AB).  
45  
46  
47  
48  
49  
50  
51  
52  
53

### 54 **Data synthesis**

55  
56 In the protocol, meta-analyses were planned if two or more studies assessed the same risk  
57 factor with suitable methodology. In comparing groups of patients with or without a risk  
58  
59  
60

1  
2  
3 factor, outcomes adjusted for baseline patient factors would be considered in preference to  
4 unadjusted outcomes and the effect of non-adjustment would be explored in a sub-group  
5 analysis. If studies reported categorical pain outcomes, risk ratios would be used to  
6 summarise cohort studies and odds ratios for case-control studies. For risk factors reported as  
7 continuous variables, results of meta-analyses would be reported as mean differences or  
8 standardised mean differences, depending on the consistency of risk factor and outcome  
9 measures reported. We planned to explore the effect of non-adjustment for other variables in  
10 a sub-group analysis. Assessment of heterogeneity was planned using the chi-squared and I-  
11 squared statistic. The protocol stated that we would conduct a sensitivity analyses on  
12 methodological quality assessment.

13  
14  
15  
16  
17  
18  
19  
20 At analysis stage, opportunities for meta-analysis were limited by heterogeneity in the  
21 assessment of risk factors and outcomes. Therefore, we undertook a descriptive narrative  
22 analysis, in keeping with the approach recommended by the Cochrane Handbook [28].  
23  
24

## 25 26 27 **RESULTS**

28  
29 After removal of duplicates, 16,430 articles were screened, of which 857 were considered  
30 potentially relevant. After detailed evaluation of full-text articles, 14 studies with data from  
31 1,613 participants were included [38-51](Figure 1). The most common reasons for excluding  
32 potentially relevant studies were because patient-related factors were not assessed and  
33 follow-up after TKR surgery was less than six months.  
34  
35  
36  
37  
38

### 39 **Study characteristics**

40  
41 An overview of study characteristics is provided in Table 1.  
42  
43  
44  
45  
46  
47  
48  
49  
50  
51  
52  
53  
54  
55  
56  
57  
58  
59  
60

Table 1: Characteristics of included studies

| Study                 | Dates of baseline data collection | Study design | Country   | Participants recruited/at final follow-up | Mean/median age | % female      | Outcome measure    | Duration of follow-up |
|-----------------------|-----------------------------------|--------------|-----------|-------------------------------------------|-----------------|---------------|--------------------|-----------------------|
| Crosbie (2010)[38]    | 2005-2006                         | Cohort*      | Australia | 102/100                                   | 68              | 56%           | WOMAC Pain         | 6 months              |
| Edwards (2009) [39]   | Not reported                      | Cohort       | USA       | 43 in analysis                            | 72              | 58%           | VAS                | 12 months             |
| Elson (2006) [40]     | 1995-1998                         | Case control | UK        | 622/402 knees                             | 69              | 54%           | AKSS pain question | 5 years               |
| Grosu (2016) [41]     | 2009-2010                         | Cohort       | Belgium   | 114/68                                    | 66              | 66%           | VDS                | 12 months             |
| Nunez (2007) [42]     | 2000-2001                         | Cohort       | Spain     | 88/67                                     | 75              | 81%           | WOMAC Pain         | 3 years               |
| Nunez (2009) [43]     | 2000                              | Cohort       | Spain     | 142/112                                   | 67              | 77%           | WOMAC Pain         | 7 years               |
| Phillips (2014) [44]  | 2009-2010                         | Cohort       | UK        | 96/80                                     | 71              | 56%           | VAS                | 39-51 months          |
| Pinto (2013) [45]     | 2009-2011                         | Cohort       | Portugal  | 42 in analysis                            | 66              | 77%           | NRS                | 4-6 months            |
| Riis (2014) [46]      | 2007-2009                         | Cohort       | Denmark   | 176 /154                                  | 68              | 65%           | AKSS pain question | 12 months             |
| Sayers (2016) [47]    | 2009-2012                         | Cohort*      | UK        | 316/277                                   | 69              | 53%           | WOMAC Pain         | 12 months             |
| Stephens (2002) [48]  | Not reported                      | Cohort       | USA       | 71/63                                     | 67              | 54%           | WOMAC Pain         | 6 months              |
| Thomazeau (2016) [49] | 2013                              | Cohort       | France    | 109/104                                   | 69              | 72%           | NRS                | 6 months              |
| Kocic (2015) [50]     | 2007-2013                         | Cohort       | Serbia    | 78/78                                     | 68              | 76%           | NRS                | 6 months              |
| Veal (2015) [51]      | 2013                              | Cohort       | Australia | 23 in analysis                            | Not available   | Not available | VDS                | 12 months             |

\*Retrospective analysis of RCT data



1  
2  
3 Of the 14 included studies, three were from the UK, two each from Australia, USA and  
4 Spain, and one study from Belgium, Denmark, France, Portugal and Serbia. Thirteen studies  
5 were conducted at a single centre and one study did not report the number of centres. Eleven  
6 of the studies were cohort studies, two were randomised controlled trials retrospectively  
7 analysed as cohort studies and one was a case-control study with prospective data collection.  
8 Sample sizes ranged from 23 to 402, with a median of 115 participants. One study included a  
9 small number of patients undergoing unicompartmental knee replacement but was included in  
10 the review as 83% of participants had TKR [49]. Follow-up assessments varied: four studies  
11 assessed outcomes at six months after TKR, five at 12 months and the remainder between 3-7  
12 years post-operative. Pain at follow-up was evaluated using the WOMAC Pain scale [52](five  
13 studies), Numerical Rating Scale (NRS; three studies), Visual Analogue Scale (VAS; two  
14 studies), American Knee Society Score Pain question [53] (two studies), and Verbal  
15 Descriptor Scale (VDS; two studies). Secondary outcomes for the review relating to serious  
16 adverse events and other aspects of pain outcomes were infrequently reported and therefore  
17 not summarised.  
18  
19  
20  
21  
22  
23  
24  
25  
26  
27  
28  
29  
30

### 31 **Assessment of methodological quality of included studies**

32  
33 Ratings of methodological quality for the 14 included studies are provided in Table 2. Eight  
34 studies reported that consecutive patients were recruited, eight studies followed up >80%  
35 participants, and nine studies conducted multivariable analysis. All studies had issues relating  
36 to selection bias because none were reported as being conducted at multiple centres.  
37  
38  
39  
40  
41  
42  
43  
44  
45  
46  
47  
48  
49  
50  
51  
52  
53  
54  
55  
56  
57  
58  
59  
60

**Table 2: Ratings of methodological quality for included studies**

| Study                          | Inclusion of consecutive patients | Representativeness (multi-centre adequate) | Percentage follow-up (>80% adequate) | Minimisation of potential confounding (multivariable analysis adequate) |
|--------------------------------|-----------------------------------|--------------------------------------------|--------------------------------------|-------------------------------------------------------------------------|
| Crosbie (2010)[38]             | +                                 | -                                          | +                                    | +                                                                       |
| Edwards (2009) [39]            |                                   | -                                          | -                                    | +                                                                       |
| Elson (2006) [40]              |                                   | -                                          | -                                    | -                                                                       |
| Grosu (2016) [41]              |                                   | -                                          | -                                    | -                                                                       |
| Nunez (2007) [42]              | +                                 | -                                          | -                                    | +                                                                       |
| Nunez (2009) [43]              | +                                 | -                                          | -                                    | +                                                                       |
| Phillips (2014) [44]           | +                                 | -                                          | +                                    | -                                                                       |
| Pinto <sup>1</sup> (2013) [45] | +                                 | -                                          | -                                    | +                                                                       |
| Riis (2014) [46]               | +                                 | -                                          | +                                    | +                                                                       |
| Sayers (2016) [47]             | + <sup>2</sup>                    | -                                          | +                                    | +                                                                       |
| Stephens (2002) [48]           |                                   |                                            | +                                    | +                                                                       |
| Thomazeau (2016) [49]          | +                                 | -                                          | +                                    | +                                                                       |
| Kocic (2015) [50]              |                                   | -                                          | +                                    | -                                                                       |
| Veal <sup>1</sup> (2015) [51]  |                                   | -                                          | +                                    | -                                                                       |

‘+’ adequate, ‘-’ inadequate, ‘blank’ not reported

<sup>1</sup>For studies which authors provided data on patients with TKR, ratings are based on the study as reported in the article; <sup>2</sup> Information obtained through personal contact.

## Patient-related post-operative risk factors

Patient-related post-operative risk factors were categorised into three groups: acute post-operative knee pain, knee function and psychosocial factors.

### *Acute post-operative knee pain*

Eight studies including data from 737 participants evaluated the association between pain in the first three months after TKR and chronic pain (Table 3). Timing of acute postoperative pain was classified as: pain within the first postoperative week; pain between one and two weeks postoperative; and pain from two weeks to three months. Pain as a risk factor was assessed using the VAS (three studies), VDS (two studies), NRS (two studies), WOMAC Pain scale (one study) and PainDETECT (one study). Five studies conducted multivariable analysis, two studies conducted univariable analysis and for one study no statistical analysis was performed as data were provided by authors on a small subset of patients with TKR.

### *Pain severity on post-operative days 1-7*

Four studies with data from 491 participants evaluated whether pain severity in the first week after surgery was associated with chronic pain [41, 45, 47, 49]. Two were at risk of bias due to missing data and one study was at risk of bias due to inadequate consideration of confounding. Methods used to assess pain included the VDS [41], VAS [47] and NRS [45, 49]. Three studies found that more severe acute post-operative pain was associated with more severe pain at 6-12 months after TKR [41, 47, 49], although in one study this association was attenuated completely after adjustment for pre-operative pain [47]. One study found no association between pain at 42 hours after surgery and the presence of chronic pain at 4-6 months [45].

### *Pain severity in post-operative days 8-14*

Three studies with data from 191 participants evaluated whether pain severity on post-operative days 8-14 was associated with chronic pain [38, 41, 51]. One study was at risk of bias due to missing data and two studies were at risk of bias due to inadequate consideration of confounding. Pain was assessed in two studies with the VDS [41, 51] and in one with the WOMAC pain scale and VAS [38]. Pain on post-operative day eight and at two weeks was not found to be associated with chronic pain in two studies [38, 41], and descriptive data only were available for the study that evaluated pain on post-operative day 10 [51]. In the study

1  
2  
3 with low risk of bias apart from with regard to representativeness [38], pain severity at two  
4 weeks was not found to be associated with pain at six months after TKR  
5  
6

7 *Pain severity between 2 weeks and 3 months post-operative*  
8

9 Five studies with data from 314 participants evaluated whether pain severity between two  
10 weeks and three months post-operative was associated with chronic pain after TKR [38, 39,  
11 41, 44, 51]. Two studies were at risk of bias due to missing data and three studies were at risk  
12 of bias due to inadequate consideration of confounding. Methods to assess pain were the  
13 WOMAC pain scale [38], VAS [38, 39, 44] and VDS [41, 51]. In one study with risk of bias  
14 associated only with conduct at a single centre, pain severity at eight weeks post-operative  
15 was found to be associated with pain at six months post-operative when assessed with the  
16 WOMAC but not the VAS [38]. In one study with univariable analysis, pain severity assessed  
17 on day 30 was found to be associated with pain severity at six months but not 12 months after  
18 TKR [41]. The same study found that pain at three months post-operative was not associated  
19 with pain severity at six months and 12 months post-operative [41]. In another study,  
20 neuropathic pain at six weeks post-operative was found to be moderately associated with pain  
21 at 39-51 months after surgery [44]. In one study, there was no difference in pain at 12  
22 months in patients with different average pain levels at six weeks [51]. However considering  
23 'worst' pain, 7/14 patients with moderate to severe pain at six weeks reported moderate to  
24 severe pain at 12 months compared with 1/9 patients with none or mild pain at six weeks. A  
25 study which assessed global pain and night pain at one month and three months post-  
26 operative found that they were associated with global pain and night pain respectively at a  
27 future time point (six months and 12 months) [39].  
28  
29  
30  
31  
32  
33  
34  
35  
36  
37  
38  
39  
40  
41  
42  
43  
44  
45  
46  
47  
48  
49  
50  
51  
52  
53  
54  
55  
56  
57  
58  
59  
60

**Table 3: Studies evaluating acute post-operative knee pain as a risk factor for chronic pain after TKR**

| Author and date    | Number in analysis | Risk factor measurement                                                                              | Outcome(s)                                                                  | Univariable or multivariable analysis                                                              | Association                       | Results summary                                                                                                                                                                                                                                                              |
|--------------------|--------------------|------------------------------------------------------------------------------------------------------|-----------------------------------------------------------------------------|----------------------------------------------------------------------------------------------------|-----------------------------------|------------------------------------------------------------------------------------------------------------------------------------------------------------------------------------------------------------------------------------------------------------------------------|
| Edwards 2009 [39]  | 43                 | Global pain VAS at 1 month and 3 months<br><br>Night pain VAS at 1 month and 3 months                | Global pain VAS at 6 and 12 months<br><br>Night pain VAS at 6 and 12 months | Multivariable generalised estimating equation model                                                | Yes<br><br>Yes                    | Global pain at a previous time point was a predictor of global pain at a future time point (estimate=0.43, SE=0.08, t=5.8, p<0.001)<br><br>Night pain at a previous time point was a predictor of night pain at a future time point (estimate=0.32, SE=0.08, t=3.8, p<0.001) |
| Crosbie 2010 [38]  | 100                | WOMAC Pain Scale at 2 weeks<br><br>VAS at 2 weeks<br><br>WOMAC Pain at 8 weeks<br><br>VAS at 8 weeks | WOMAC Pain scale at 6 months                                                | Multivariable linear regression                                                                    | No<br><br>No<br><br>Yes<br><br>No | Not significant, results not reported<br><br>Not significant, results not reported<br><br>Beta coefficient = +0.25 ± 0.07<br><br>Not significant, results not reported                                                                                                       |
| Pinto 2013 [45]    | 42                 | NRS at 48 hours                                                                                      | NRS at 4-6 months                                                           | Hierarchical logistic regression                                                                   | No                                | Exp(B) =0.998 (95% CI 0.623-1.601), p value=0.995                                                                                                                                                                                                                            |
| Phillips 2014 [44] | 80                 | PainDETECT at 6 weeks                                                                                | Pain VAS at 39-51 months                                                    | Univariable correlation                                                                            | Yes                               | PainDETECT at 6 weeks correlated moderately with VAS pain scores (r=0.53)                                                                                                                                                                                                    |
| Veal 2015 [51]     | 23                 | VDS for average pain at 10 days                                                                      | VDS for average pain at 12 months                                           | N/A – statistical analysis inappropriate as data provided by authors on a small subset of patients | N/A                               | 11 patients had none/mild pain at 10 days, none of these patients had severe/moderate pain at 12 months.<br><br>12 patients had moderate/severe pain at 10 days, 2 of these patients had moderate/severe at 12 months.                                                       |

1  
2  
3  
4  
5  
6  
7  
8  
9  
10  
11  
12  
13  
14  
15  
16  
17  
18  
19  
20  
21  
22  
23  
24  
25  
26  
27  
28  
29  
30  
31  
32  
33  
34  
35  
36  
37  
38  
39  
40  
41  
42  
43  
44  
45  
46  
47  
48  
49

For peer review only

|                 |    |                                                                    |                                     |                         |            |                                                                                                         |
|-----------------|----|--------------------------------------------------------------------|-------------------------------------|-------------------------|------------|---------------------------------------------------------------------------------------------------------|
|                 |    | VDS for worst pain at 10 days                                      | VDS for worse pain at 12 months     |                         |            | 2 patients had none/mild pain at 10 days, none of these patients had severe/moderate pain at 12 months. |
|                 |    | VDS for average pain at 6 week                                     | VDS for average pain at 12 months   |                         |            | 21 patients had moderate/severe pain at 10 days, 8 of these patients had moderate/severe at 12 months.  |
|                 |    | VDS for worst pain at 6 weeks                                      | VDS for worse pain at 12 months     |                         |            | 17 patients had none/mild pain at 6 weeks, 1 of these patients had moderate/severe pain at 12 months.   |
|                 |    |                                                                    |                                     |                         |            | 6 patients had moderate/severe pain at 6 weeks, 1 of these patients had moderate/severe at 12 months.   |
|                 |    |                                                                    |                                     |                         |            | 9 patients had none/mild pain at 6 weeks, 1 of these patients had severe/moderate pain at 12 months.    |
|                 |    |                                                                    |                                     |                         |            | 14 patients had moderate/severe pain at 6 weeks, 7 of these patients had moderate/severe at 12 months.  |
| Grosu 2016 [41] | 68 | VDS on days 1,2 and 3 (cumulative value of maximal pain intensity) | VDS at 6 months<br>VDS at 12 months | Univariable correlation | Yes<br>Yes | r=0.350; p value = 0.009<br>r=0.350; p value = 0.009                                                    |
|                 |    | VDS on day 8                                                       | VDS at 6 months<br>VDS at 12 months |                         | No<br>No   | Not significant, results not reported<br>Not significant, results not reported                          |
|                 |    | VDS on day 30                                                      | VDS at 6 months                     |                         | Yes        | r=0.310, p=0.013                                                                                        |

|                     |     |                                                      |                         |                                             |     |                                                                                                                                                                                                                                                       |
|---------------------|-----|------------------------------------------------------|-------------------------|---------------------------------------------|-----|-------------------------------------------------------------------------------------------------------------------------------------------------------------------------------------------------------------------------------------------------------|
|                     |     |                                                      | VDS at 12 months        |                                             | No  | Not significant, results not reported                                                                                                                                                                                                                 |
|                     |     | VDS at 3 months                                      | VDS at 6 months         |                                             | No  | Not significant, results not reported                                                                                                                                                                                                                 |
|                     |     |                                                      | VDS at 12 months        |                                             | No  | Not significant, results not reported                                                                                                                                                                                                                 |
| Sayers 2016 [47]    | 277 | VAS for pain on rest on days 1,2 and 3 (combined)    | WOMAC Pain at 12 months | Multivariable structural equation modelling | Yes | Beta=0.222, SE=0.058, 95% CI = 0.109, 0.336, p value = 0.0001<br><br>When pre-operative pain added: Beta=0.09, 95% CI = -0.09, 0.27, p value = 0.332                                                                                                  |
|                     |     | VAS for pain on movement on days 1,2 and 3(combined) |                         |                                             | Yes | Beta=0.140, SE=0.044, 95% CI = 0.054, 0.226, p value = 0.0014<br><br>When pre-operative pain added: Beta=0.00, 95% CI = -0.14, 0.15, p value = 0.955                                                                                                  |
| Thomazeau 2016 [49] | 104 | NRS on days 1-4                                      | NRS at 6 months         | Multivariate logistic regression            | Yes | Patients with high intensity acute post-operative pain (defined though Latent Class Growth analysis) were more likely to have pain at 6 months than patients with low intensity acute post-operative pain (OR=4.23, 95% CI=1.39-12.88, p-value=0.011) |

### *Knee function*

Five studies including data from 835 participants evaluated the association between post-operative knee function and chronic pain after TKR (Table 4). Three studies were at risk of bias due to missing data and one study was at risk of bias due to inadequate consideration of confounding. Assessment of knee function varied and included range of motion, ambulatory status, WOMAC Function, six minute walk test and stair ascent speed.

Four studies including data from 735 participants evaluated whether function at hospital discharge was associated with chronic pain after TKR [40, 42, 43, 46]. Two of these studies assessed range of motion [40, 46] and two assessed ambulatory status at discharge [42, 43]; none found an association. One study, at low risk of bias except inclusion of a single centre, with 100 patients evaluated whether function at two weeks and eight weeks, assessed using three different methods, was associated with WOMAC Pain scores at six months post-operative [38]. This study found that WOMAC Function score at two weeks, but not eight weeks, was associated with chronic pain; six minute walk test at both two weeks and eight weeks was associated with chronic pain; stair ascent speed at two and eight weeks was not associated with chronic pain.



Table 4: Studies evaluating post-operative knee function as a risk factor for chronic pain after TKR

| Author and date             | Number in analysis | Risk factor measurement                                    | Outcome                | Univariable or multivariable analysis    | Association | Results summary                        |
|-----------------------------|--------------------|------------------------------------------------------------|------------------------|------------------------------------------|-------------|----------------------------------------|
| Elson and Brenkel 2006 [40] | 402 knees          | Range of motion (active and passive) at hospital discharge | AKSS Pain at 5 years   | Univariable analysis                     | No          | Not significant, results not reported  |
| Nunez 2007 [42]             | 67                 | Ambulatory status at hospital discharge                    | WOMAC Pain at 3 years  | Multivariable linear regression          | No          | Not significant, results not reported  |
| Nunez 2009 [43]             | 112                | Ambulatory status at hospital discharge                    | WOMAC Pain at 7 years  | Multivariable linear regression          | No          | Not significant, results not reported  |
| Crosbie 2010 [38]           | 100                | WOMAC Function at 2 weeks                                  | WOMAC Pain at 6 months | Multivariable linear regression          | Yes         | Beta coefficient = +0.06, SE = ± 0.02. |
|                             |                    | 6 minute walk test at 2 weeks                              |                        |                                          | Yes         | Beta coefficient = -0.05, SE = ± 0.01. |
|                             |                    | Stair ascent speed at 2 weeks                              |                        |                                          | No          | Not significant, results not reported  |
|                             |                    | WOMAC Function at 8 weeks                                  |                        |                                          | No          | Not significant, results not reported  |
|                             |                    | 6 minute walk test at 8 weeks                              |                        |                                          | Yes         | Beta coefficient = -0.04, SE = ± 0.01. |
| Riis 2014 [46]              | 154                | Range of flexion (active) at hospital discharge            | AKSS Pain at 12 months | Multivariable binary logistic regression | No          | OR 1.00 (95% CI 0.99 to 1.04), p=0.698 |

### *Psychosocial factors*

Four studies including data from 226 participants evaluated the association between post-operative psychological factors and chronic pain after TKR (Table 5). Two studies were at risk of bias due to missing data and one study was at risk of bias due to inadequate consideration of confounding. Risk factors assessed included catastrophising, depression, social support, coping skills, fear of movement and anxiety. In one study, catastrophising at a previous time point was a risk factor for night pain, but not global pain, at a future time point [39]. In the same study, depression was found to be a risk factor for global pain but not night pain. Another study assessing risk factors at six weeks post-operative found that perceived positive social support was associated with less chronic pain, negative social support with more chronic pain, and no association between coping and pain at six months after TKR [48]. Patients with a high fear of movement at two weeks post-operative reported more pain at six months than those with a low fear of movement [50]. Greater anxiety at 48 hours after surgery was found to be associated with a higher risk of having a pain score of >3 on a NRS at 4-6 months after TKR [45].

### **Ongoing studies**

Searches of ClinicalTrials.gov identified five ongoing studies which are collecting data on patient-related post-operative risk factors and pain outcomes at six months or longer after TKR. An overview of these studies is provided in Appendix 3.

Table 5: Studies evaluating post-operative psychological factors as risk factors for chronic pain after TKR

| Author and date    | Number in analysis | Risk factor measurement                                                                              | Outcome(s)                         | Univariable or multivariable analysis               | Association | Results summary                                                                                                                                |
|--------------------|--------------------|------------------------------------------------------------------------------------------------------|------------------------------------|-----------------------------------------------------|-------------|------------------------------------------------------------------------------------------------------------------------------------------------|
| Stephens 2002 [48] | 63                 | Perceived positive social support (MOS Social Support survey) at 6 weeks                             | WOMAC Pain at 6 months             | Multivariable hierarchical multiple regression      | Yes         | Beta=-0.29, SE=0.09, $p \leq 0.05$                                                                                                             |
|                    |                    | Perceived negative social support (4 items) at 6 weeks                                               |                                    |                                                     | Yes         | Beta=-0.27, SE=0.14, $p \leq 0.05$                                                                                                             |
|                    |                    | Active coping (Vanderbilt Multidimensional Pain Coping Inventory Active Coping scale) at 6 weeks     |                                    |                                                     | No          | Beta=-0.14, SE=0.01                                                                                                                            |
|                    |                    | Avoidant coping (Vanderbilt Multidimensional Pain Coping Inventory Avoidant Coping scale) at 6 weeks |                                    |                                                     | No          | Beta=0.21, SE=0.01                                                                                                                             |
| Edwards 2009 [39]  | 43                 | Catastrophising (Coping Strategies Questionnaire catastrophizing subscale) at 1 month and 3 months   | Global pain VAS at 6 and 12 months | Multivariable generalised estimating equation model | No          | Catastrophising at a previous time point was not a predictor of global pain at a future time point (estimate=2.1, SE=2.2, $t=0.9$ , $p=0.35$ ) |
|                    |                    |                                                                                                      | Night pain VAS at 6 and 12 months  |                                                     | Yes         | Catastrophising at a previous time was a predictor of nighttime pain at a future time point (estimate=5.1, SE=2.5, $t=2.0$ , $p=0.04$ ).       |
|                    |                    | Depression (Centre for Epidemiological Studies Depression Scale at 1 month and 3 months)             | Global pain VAS at 6 and 12 months |                                                     | Yes         | Depression at a previous time point was a predictor of global pain at a future time point (estimate=0.67, SE=0.30, $t=2.2$ , $p=0.03$ )        |

1  
2  
3  
4  
5  
6  
7  
8  
9  
10  
11  
12  
13  
14  
15  
16  
17  
18  
19  
20  
21  
22  
23  
24  
25  
26  
27  
28  
29  
30  
31  
32  
33  
34  
35  
36  
37  
38  
39  
40  
41  
42  
43  
44  
45  
46  
47  
48  
49

|                 |    |                                                                   |                                   |                                  |     |                                                                                                                                              |
|-----------------|----|-------------------------------------------------------------------|-----------------------------------|----------------------------------|-----|----------------------------------------------------------------------------------------------------------------------------------------------|
|                 |    |                                                                   | Night pain VAS at 6 and 12 months |                                  | No  | Depression at a previous time point was not a predictor of nighttime pain at a future time point (estimate=0.40, SE=0.33, t=1.2, p=0.24).    |
| Pinto 2013 [45] | 42 | Anxiety scale (Hospital Anxiety and Depression Scale) at 48 hours | NRS at 4-6 months                 | Hierarchical logistic regression | Yes | Exp(B) = 1.713 (95% CI 1.104-2.657), p value=0.016                                                                                           |
| Kocic 2015 [50] | 78 | Fear of movement (Tampa Scale of Kinesiophobia) at 2 weeks        | NRS at 6 months                   | Univariable comparison of means  | Yes | Patients with high fear of movement had more pain (mean=3.24, SD=1.98) than patients with low fear of movement (mean=1.81, SD=1.5), p=0.0035 |

peer review only

## DISCUSSION

This is the first systematic review to evaluate post-operative patient-related risk factors for chronic pain after TKR. Fourteen cohort studies were identified which evaluated the association between patient-related factors measured in the first three months post-operative and pain severity measured with a patient-reported outcome measure at six months or longer after primary TKR. Post-operative factors assessed included pain (eight studies), function (five studies) and psychosocial factors (four studies).

For all post-operative patient-related factors, there was insufficient evidence to draw firm conclusions on the association with chronic pain after TKR. When reviewing observational cohort studies, it is essential to consider issues that may introduce bias and lead to potentially misleading results and their interpretation. The key issues relate to generalisability, incomplete follow-up and accounting for confounding factors. Regarding generalisability, findings from single-centre and multi-centre studies can differ [54], and one potential factor contributing to this difference is the recruitment of a more homogeneous population in single-centre studies. The population may be highly selected and therefore have limited validity external to the study setting. Losses to follow-up represent another cause of bias as patients who do not complete longer-term assessments may have poorer outcomes [55, 56]. In this review, six studies had data on <80% participants at follow-up. The methodological quality of five studies was limited by the lack of multivariable analysis to minimise the impact of potential confounding on results. In studies with no risk of bias other than patient selection, there was a suggestion that chronic pain was associated with increased acute post-operative pain during the hospital stay [47, 49]. However, in one of these studies, a comprehensive assessment of pain relationships over time suggested that the association was largely explained by pre-operative pain [47]. For later pain assessments, one study did not identify consistent associations between post-operative pain and chronic pain [38].

This review has strengths and weaknesses which should be considered when interpreting the results. While our search terms were broad to identify cohort studies which involved patients with TKR, three studies were identified through methods other than the main searches. This is a recognised issue in the identification of observational studies [57] and highlights the importance in bibliographic databases of appropriate indexing and use of keywords. It is possible that studies including general orthopaedic or surgical populations may have included patients with TKR, and these may not have been identified. However, when these studies were identified, we contacted authors and data for patients with TKR were provided for two

1  
2  
3 studies [45, 51]. The primary outcome of interest in this review was pain at six months or  
4 longer after TKR, and therefore we did not include studies that used a composite pain and  
5 function measure to assess outcome, for example the total Oxford Knee Score [58] or  
6 WOMAC [52]. This is because when such composite measures are reported without any  
7 separation of pain from function it is not possible to use the scores to assess pain *per se*. Pre-  
8 operative risk factors for post-operative pain and functional limitations are different [18, 59],  
9 and therefore it is important to assess pain and function as distinct outcomes. Separate pain  
10 and function scores can be calculated for the most commonly used patient-reported outcome  
11 measures, the WOMAC [60] and the Oxford Knee Score [61], and future studies would  
12 benefit from analysing these outcomes separately. Research on post-operative risk factors is  
13 limited by heterogeneity in how and when risk factors and outcomes are assessed. If greater  
14 standardisation could be achieved, such as through the implementation of core outcome sets  
15 [33], future systematic reviews may be able to pool data in meta-analysis to provide evidence  
16 for post-operative patient-related risk factors for chronic pain after TKR.  
17  
18  
19  
20  
21  
22  
23  
24  
25  
26

27 Much of the research evaluating risk factors for outcomes after TKR has focused on the pre-  
28 operative period rather than the period after surgery [12]. Numerous pre-operative patient-  
29 related factors and their association to chronic pain have been evaluated, including knee pain  
30 severity and duration, pain at other sites, comorbidities, function, depression, social support,  
31 anxiety, fear of movement, pessimism and quality of life [12]. In comparison, our review  
32 found that the current extent of research into post-operative risk factors is narrow, and further  
33 research is needed. Searches of ClinicalTrials.gov found that a number of studies are ongoing  
34 in this field, suggesting the evidence-base will continue to grow and develop. Assessing  
35 potential post-operative risk factors is important as some factors may be more associated with  
36 outcome when measured in the post-operative period, rather than the pre-operative period  
37 [62]. Prediction of chronic post-surgical pain has been found to be strongest when assessing  
38 both pre-operative and post-operative risk factors [20]. Factors specific to the post-operative  
39 recovery period, such as acute post-operative pain, and factors which span the peri-operative  
40 period, such as anxiety, have the potential to influence outcomes. Identification of both pre-  
41 operative and post-operative risk factors could inform the development of comprehensive  
42 care packages to improve outcomes.  
43  
44  
45  
46  
47  
48  
49  
50  
51  
52

53  
54 Despite the lack of sufficient evidence about post-operative risk factors, research has  
55 evaluated whether early post-operative interventions improve longer-term outcomes after  
56 TKR. The long-term effects of pharmacological interventions to reduce pain severity in the  
57  
58  
59  
60

1  
2  
3 early post-operative period have been evaluated, both in patients undergoing TKR and other  
4 surgical procedures [21, 22]. While effective at reducing acute post-operative pain, numerous  
5 peri-operative pharmacotherapies are not effective at preventing chronic post-surgical pain.  
6  
7 Similarly, outpatient physiotherapy interventions to improve early post-operative function  
8 have little effect on long-term pain [23, 24]. This may be because acute post-operative pain  
9 and functional limitations are not risk factors for chronic pain after TKR or it may be that  
10 these interventions require evaluation in trials that are focused on high-risk patients.  
11  
12 However, before evaluation of such stratified models of care is possible, more research is  
13 needed to identify post-operative patient-related risk factors for chronic pain after TKR.  
14  
15  
16  
17

18  
19 In conclusion, this systematic review found insufficient evidence to draw conclusions about  
20 the association between any post-operative patient-related factor and chronic pain after TKR.  
21 To complement this research, systematic reviews are ongoing to evaluate the effectiveness of  
22 pre-operative, peri-operative and post-operative interventions in preventing chronic pain after  
23 TKR (PROSPERO reference CRD42017041382). Further high-quality research is required to  
24 provide robust evidence on post-operative risk factors, and inform the development and  
25 evaluation of targeted interventions to optimise patients' outcomes after TKR.  
26  
27  
28  
29  
30  
31  
32  
33  
34  
35  
36  
37  
38  
39  
40  
41  
42  
43  
44  
45  
46  
47  
48  
49  
50  
51  
52  
53  
54  
55  
56  
57  
58  
59  
60

### **Acknowledgements**

We would like to thank all the study authors who took the time to reply to our requests for further clarification or additional data.

### **Author contributions**

All authors contributed to the concept and design of the study. ADB, JD and VW contributed to the acquisition and analysis of data. VW drafted the article and ADB, JD and RGH revised it critically for important intellectual content. VW and ADB take responsibility for the integrity of the work as a whole, from inception to finished article.

### **Funding**

This article presents independent research funded by the National Institute for Health Research (NIHR) under its Programme Grants for Applied Research programme (RP-PG-0613-20001). The views expressed are those of the authors and not necessarily those of the NHS, the NIHR or the Department of Health. The funder had no role in the study design, collection, analysis and interpretation of data; in the writing of the manuscript; or in the decision to submit the manuscript for publication.

### **Competing interests**

The authors have no conflicts of interest to declare.

### **Data sharing statement**

No additional data are available.

### **Figure legends**

Figure 1: Systematic review flow diagram



## References

1. National Joint Registry for England W, Northern Ireland and the Isle of Man. 13th Annual Report Hemel Hempstead: NJR Centre.2016.
2. Scottish Arthroplasty Project. Biennial report NHS National Services Scotland2016.
3. Maradit Kremers H, Larson DR, Crowson CS, Kremers WK, Washington RE, Steiner CA, et al. Prevalence of Total Hip and Knee Replacement in the United States. *J Bone Joint Surg Am* 2015; 97: 1386-1397.
4. Scott CE, Bugler KE, Clement ND, MacDonald D, Howie CR, Biant LC. Patient expectations of arthroplasty of the hip and knee. *J Bone Joint Surg Br* 2012; 94: 974-981.
5. Beswick AD, Wylde V, Goberman-Hill R, Blom A, Dieppe P. What proportion of patients report long-term pain after total hip or knee replacement for osteoarthritis? A systematic review of prospective studies in unselected patients. *BMJ Open* 2012; 2: e000435.
6. Wylde V, Hewlett S, Learmonth ID, Dieppe P. Persistent pain after joint replacement: Prevalence, sensory qualities, and postoperative determinants. *Pain* 2011; 152: 566-572.
7. Werner MU, Kongsgaard UE. I. Defining persistent post-surgical pain: is an update required? *Br J Anaesth* 2014; 113: 1-4.
8. Jeffery AE, Wylde V, Blom AW, Horwood JP. "It's there and I'm stuck with it": patients' experiences of chronic pain following total knee replacement surgery. *Arthritis Care Res (Hoboken)* 2011; 63: 286-292.
9. Wylde V, Mackichan, Dixon S, Goberman-Hill R. Service provision for patients with chronic post-surgical pain after total knee replacement: An evaluation of current practice. *Journal of Pain Management* 2014; 7: 147-154.
10. MacKichan F, Wylde V, Goberman-Hill R. Pathways Through Care for Long-Term Pain After Knee Replacement: A Qualitative Study With Healthcare Professionals. *Musculoskeletal Care* 2015.
11. Beswick AD, Wylde V, Goberman-Hill R. Interventions for the prediction and management of chronic postsurgical pain after total knee replacement: systematic review of randomised controlled trials. *BMJ Open* 2015; 5: e007387.

12. Lewis GN, Rice DA, McNair PJ, Kluger M. Predictors of persistent pain after total knee arthroplasty: a systematic review and meta-analysis. *British journal of anaesthesia* 2015; 114: 551-561.
13. Baert IA, Lluch E, Mulder T, Nijs J, Noten S, Meeus M. Does pre-surgical central modulation of pain influence outcome after total knee replacement? A systematic review. *Osteoarthritis Cartilage* 2016; 24: 213-223.
14. Hernandez C, Diaz-Heredia J, Berraquero ML, Crespo P, Loza E, Ruiz Iban MA. Pre-operative Predictive Factors of Post-operative Pain in Patients With Hip or Knee Arthroplasty: A Systematic Review. *Reumatol Clin* 2015; 11: 361-380.
15. Blom AW, Artz N, Beswick AD, Burston A, Dieppe P, Elvers KT, et al. Improving patients' experience and outcome of total joint replacement: the RESTORE programme. In: NIHR Journals Library Southampton (UK)2016.
16. Birch S, Stilling M, Mechlenburg I, Hansen TB. Effectiveness of a physiotherapist delivered cognitive-behavioral patient education for patients who undergoes operation for total knee arthroplasty: a protocol of a randomized controlled trial. *BMC Musculoskelet Disord* 2017; 18: 116.
17. Riddle DL, Keefe FJ, Ang D, J K, Dumenci L, Jensen MP, et al. A phase III randomized three-arm trial of physical therapist delivered pain coping skills training for patients with total knee arthroplasty: the KASTPain protocol. *BMC Musculoskelet Disord* 2012; 13: 149.
18. Judge A, Arden NK, Cooper C, Kassim Javaid M, Carr AJ, Field RE, et al. Predictors of outcomes of total knee replacement surgery. *Rheumatology (Oxford, England)* 2012; 51: 1804-1813.
19. Macrae WA. Chronic post-surgical pain: 10 years on. *Br J Anaesth* 2008; 101: 77-86.
20. Althaus A, Hinrichs-Rocker A, Chapman R, Arranz Becker O, Lefering R, Simanski C, et al. Development of a risk index for the prediction of chronic post-surgical pain. *Eur J Pain* 2012; 16: 901-910.
21. Wylde V, Lenguerrand E, Gooberman-Hill R, Beswick AD, Marques E, Noble S, et al. Effect of local anaesthetic infiltration on chronic postsurgical pain after total hip and knee replacement: the APEX randomised controlled trials. *Pain* 2015; 156: 1161-1170.
22. Chaparro LE, Smith SA, Moore RA, Wiffen PJ, Gilron I. Pharmacotherapy for the prevention of chronic pain after surgery in adults. *Cochrane Database Syst Rev* 2013: CD008307.

- 1  
2  
3  
4  
5  
6  
7  
8  
9  
10  
11  
12  
13  
14  
15  
16  
17  
18  
19  
20  
21  
22  
23  
24  
25  
26  
27  
28  
29  
30  
31  
32  
33  
34  
35  
36  
37  
38  
39  
40  
41  
42  
43  
44  
45  
46  
47  
48  
49  
50  
51  
52  
53  
54  
55  
56  
57  
58  
59  
60
23. Artz N, Elvers KT, Lowe CM, Sackley C, Jepson P, Beswick AD. Effectiveness of physiotherapy exercise following total knee replacement: systematic review and meta-analysis. *BMC Musculoskelet Disord* 2015; 16: 15.
  24. Fransen M, Nairn L, Bridgett L, Crosbie J, March L, Parker D, et al. Post-Acute Rehabilitation After Total Knee Replacement: A Multicenter Randomized Clinical Trial Comparing Long-Term Outcomes. *Arthritis Care Res (Hoboken)* 2017; 69: 192-200.
  25. Moher D, Liberati A, Tetzlaff J, Altman DG, Group P. Preferred reporting items for systematic reviews and meta-analyses: the PRISMA statement. *BMJ* 2009; 339: b2535.
  26. Marcano Belisario J, Tudor Car L, Reeves T, Gunn L, Car J. Search strategies to identify observational studies in MEDLINE and EMBASE (Protocol). *Cochrane Database of Systematic Reviews* 2013: MR000041.
  27. Scottish Intercollegiate Guidelines Network. Search filters. <http://www.sign.ac.uk/methodology/filters.html#obs> Accessed September 2016; Last updated on 23/01/17.
  28. Higgins J, Green SE. *Cochrane Handbook for Systematic Reviews of Interventions* Version 5.1.0 [updated March 2011]. The Cochrane Collaboration, 2011. Available from [www.cochrane-handbook.org](http://www.cochrane-handbook.org). 2011.
  29. Lenguerrand E, Wylde V, Gooberman-Hill R, Sayers A, Brunton L, Beswick AD, et al. Trajectories of Pain and Function after Primary Hip and Knee Arthroplasty: The ADAPT Cohort Study. *PLoS One* 2016; 11: e0149306.
  30. Davis AM, Perruccio AV, Ibrahim S, Hogg-Johnson S, Wong R, Streiner DL, et al. The trajectory of recovery and the inter-relationships of symptoms, activity and participation in the first year following total hip and knee replacement. *Osteoarthritis Cartilage* 2011; 19: 1413-1421.
  31. Halket A, Stratford PW, Kennedy DM, Woodhouse LJ. Using hierarchical linear modeling to explore predictors of pain after total hip and knee arthroplasty as a consequence of osteoarthritis. *J Arthroplasty* 2010; 25: 254-262.
  32. Wylde V, Dixon S, Miller L, Whitehouse MR, Blom AW. 5 Year Outcomes and Survivorship of the Triathlon Total Knee Replacement: A Cohort Study. *Acta Orthop Belg* in press.

- 1  
2  
3 33. Wylde V, Mackichan F, Bruce J, Gooberman-Hill R. Assessment of chronic post-  
4 surgical pain after knee replacement: Development of a core outcome set. *European*  
5 *Journal of Pain* 2015; 19: 611-620.  
6  
7  
8 34. Wells G, Shea B, O'Connell D, Peterson J, Welch V, Losos M, et al. The Newcastle-  
9 Ottawa Scale (NOS) for assessing the quality if nonrandomized studies in meta-  
10 analyses. vol. 2017. Available from: URL:  
11 [http://www.ohri.ca/programs/clinical\\_epidemiology/oxford.asp](http://www.ohri.ca/programs/clinical_epidemiology/oxford.asp) 2014.  
12  
13 35. Sterne JA, Hernan MA, Reeves BC, Savovic J, Berkman ND, Viswanathan M, et al.  
14 ROBINS-I: a tool for assessing risk of bias in non-randomised studies of  
15 interventions. *BMJ* 2016; 355: i4919.  
16  
17 36. Slim K, Nini E, Forestier D, Kwiatkowski F, Panis Y, Chipponi J. Methodological  
18 index for non-randomized studies (minors): development and validation of a new  
19 instrument. *ANZ J Surg* 2003; 73: 712-716.  
20  
21 37. Juni P, Witschi A, Bloch R, Egger M. The hazards of scoring the quality of clinical  
22 trials for meta-analysis. *JAMA* 1999; 282: 1054-1060.  
23  
24 38. Crosbie J, Naylor J, Harmer A, Russell T. Predictors of functional ambulation and  
25 patient perception following total knee replacement and short-term rehabilitation.  
26 *Disability and rehabilitation* 2010; 32: 1088-1098.  
27  
28 39. Edwards RR, Haythornthwaite JA, Smith MT, Klick B, Katz JN. Catastrophizing and  
29 depressive symptoms as prospective predictors of outcomes following total knee  
30 replacement. *Pain Research & Management* 2009; 14: 307-311.  
31  
32 40. Elson DW, Brenkel IJ. Predicting Pain After Total Knee Arthroplasty. *The Journal of*  
33 *Arthroplasty* 2006; 21: 1047-1053.  
34  
35 41. Grosu I, Thienpont E, Dekock M, Scholtes JL, Lavand'homme P. Dynamic view of  
36 postoperative pain evolution after total knee arthroplasty: A prospective observational  
37 study. *Minerva Anestesiologica* 2016; 82: 274-283.  
38  
39 42. Nunez M, Nunez E, Luis del Val J, Ortega R, Segur JM, Hernandez MV, et al.  
40 Health-related quality of life in patients with osteoarthritis after total knee  
41 replacement: Factors influencing outcomes at 36 months of follow-up. *Osteoarthritis*  
42 *and Cartilage* 2007; 15: 1001-1007.  
43  
44 43. Nunez M, Lozano L, Nunez E, Segur JM, Sastre S, Macule F, et al. Total knee  
45 replacement and health-related quality of life: factors influencing long-term outcomes.  
46 *Arthritis and rheumatism* 2009; 61: 1062-1069.  
47  
48  
49  
50  
51  
52  
53  
54  
55  
56  
57  
58  
59  
60

- 1  
2  
3 44. Phillips JRA, Hopwood B, Arthur C, Stroud R, Toms AD. The natural history of pain  
4 and neuropathic pain after knee replacement: a prospective cohort study of the point  
5 prevalence of pain and neuropathic pain to a minimum three-year follow-up. *The*  
6 *bone & joint journal* 2014; 96-B: 1227-1233.  
7  
8  
9  
10 45. Pinto PR, McIntyre T, Ferrero R, Almeida A, Araujo-Soares V. Risk factors for  
11 moderate and severe persistent pain in patients undergoing total knee and hip  
12 arthroplasty: a prospective predictive study. *PloS one* 2013; 8: e73917.  
13  
14 46. Riis A, Rathleff MS, Jensen MB, Simonsen O. Low grading of the severity of knee  
15 osteoarthritis pre-operatively is associated with a lower functional level after total  
16 knee replacement: a prospective cohort study with 12 months' follow-up. *The bone &*  
17 *joint journal* 2014; 96-B: 1498-1502.  
18  
19 47. Sayers A, Wylde V, Lenguerrand E, Beswick AD, Gooberman-Hill R, Pyke M, et al.  
20 Rest Pain and Movement-Evoked Pain as Unique Constructs in Hip and Knee  
21 Replacements. *Arthritis Care Res (Hoboken)* 2016; 68: 237-245.  
22  
23 48. Stephens MAP, Druley JA, Zautra AJ. Older adults' recovery from surgery for  
24 osteoarthritis of the knee: Psychosocial resources and constraints as predictors of  
25 outcomes. *Health Psychology* 2002; 21: 377-383.  
26  
27 49. Thomazeau J, Rouquette A, Martinez V, Rabuel C, Prince N, Laplanche JL, et al.  
28 Predictive factors of chronic post-surgical pain at 6 months following knee  
29 replacement: Influence of postoperative pain trajectory and genetics. *Pain Physician*  
30 2016; 19: E729-E741.  
31  
32 50. Kocic M, Stankovic A, Lazovic M, Dimitrijevic L, Stankovic I, Spalevic M, et al.  
33 Influence of fear of movement on total knee arthroplasty outcome. *Annali Italiani Di*  
34 *Chirurgia* 2015; 86: 148-155.  
35  
36 51. Veal FC, Bereznicki LRE, Thompson AJ, Peterson GM, Orlikowski C. Subacute Pain  
37 as a Predictor of Long-Term Pain Following Orthopedic Surgery An Australian  
38 Prospective 12 Month Observational Cohort Study. *Medicine* 2015; 94.  
39  
40 52. Bellamy N, Buchanan WW, Goldsmith CH, Campbell J, Stitt LW. Validation study of  
41 WOMAC: a health status instrument for measuring clinically important patient  
42 relevant outcomes to antirheumatic drug therapy in patients with osteoarthritis of the  
43 hip or knee. *J Rheumatol* 1988; 15: 1833-1840.  
44  
45 53. Insall JN, Dorr LD, Scott RD, Scott WN. Rationale of the Knee Society clinical rating  
46 system. *Clinical Orthopaedics and Related Research* 1989: 13-14.  
47  
48  
49  
50  
51  
52  
53  
54  
55  
56  
57  
58  
59  
60

- 1  
2  
3 54. Bafeta A, Dechartres A, Trinquart L, Yavchitz A, Boutron I, Ravaud P. Impact of  
4 single centre status on estimates of intervention effects in trials with continuous  
5 outcomes: meta-epidemiological study. *BMJ* 2012; 344: e813.  
6  
7  
8 55. Murray DW, Britton AR, Bulstrode CJK. Loss to follow-up matters. *J Bone Joint*  
9 *Surg Br* 1997; 79-B: 254-257.  
10  
11 56. Kim J, Lonner JH, Nelson CL, Lotke PA. Response Bias: Effect on Outcomes  
12 Evaluation by Mail Surveys after Total Knee Arthroplasty. *Journal of Bone and Joint*  
13 *Surgery - Series A* 2004; 86: 15-21.  
14  
15  
16 57. Stroup DF, Berlin JA, Morton SC, Olkin I, Williamson GD, Rennie D, et al. Meta-  
17 analysis of observational studies in epidemiology: a proposal for reporting. Meta-  
18 analysis Of Observational Studies in Epidemiology (MOOSE) group. *JAMA* 2000;  
19 283: 2008-2012.  
20  
21  
22  
23 58. Dawson J, Fitzpatrick R, Murray D, Carr A. Questionnaire on the perceptions of  
24 patients about total knee replacement. *The Journal of bone and joint surgery. British*  
25 *volume* 1998; 80: 63-69.  
26  
27  
28 59. Lopez-Olivo MA, Landon GC, Siff SJ, Edelstein D, Pak C, Kallen MA, et al.  
29 Psychosocial determinants of outcomes in knee replacement. *Annals of the rheumatic*  
30 *diseases* 2011; 70: 1775-1781.  
31  
32  
33 60. Bellamy N. WOMAC: a 20-year experiential review of a patient-centered self-  
34 reported health status questionnaire. *J Rheumatol* 2002; 29: 2473-2476.  
35  
36  
37 61. Harris K, Dawson J, Doll H, Field RE, Murray DW, Fitzpatrick R, et al. Can pain and  
38 function be distinguished in the Oxford Knee Score in a meaningful way? An  
39 exploratory and confirmatory factor analysis. *Quality of Life Research: An*  
40 *International Journal of Quality of Life Aspects of Treatment, Care & Rehabilitation*  
41 2013; 22: 2561-2568.  
42  
43  
44 62. van den Akker-Scheek I, Stevens M, Groothoff JW, Bulstra SK, Zijlstra W.  
45 Preoperative or postoperative self-efficacy: which is a better predictor of outcome  
46 after total hip or knee arthroplasty? *Patient education and counseling* 2007; 66: 92-99.  
47  
48  
49  
50  
51  
52  
53  
54  
55  
56  
57  
58  
59  
60

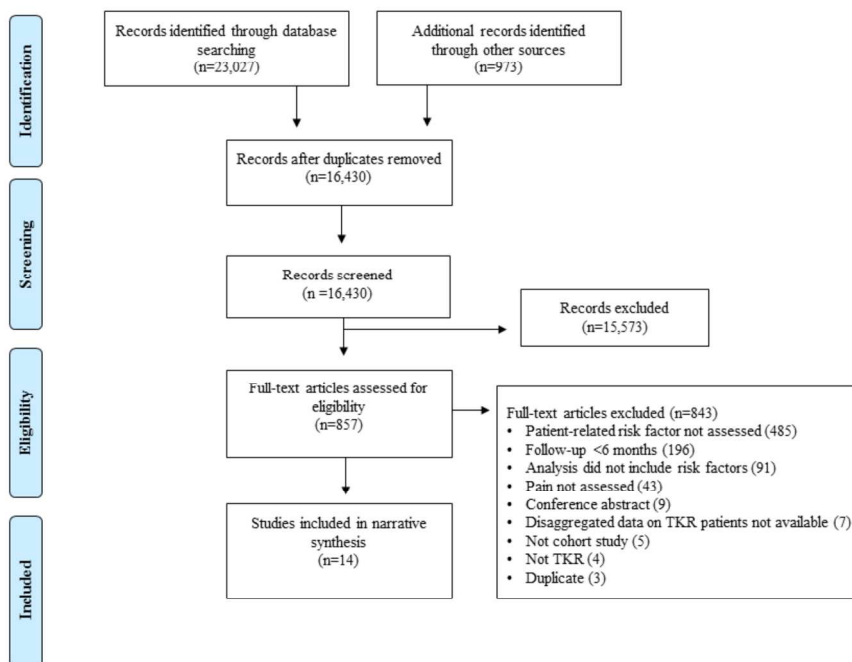

Figure 1: Systematic review flow diagram

181x135mm (300 x 300 DPI)

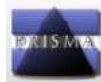

# PRISMA 2009 Checklist

| Section/topic                      | #  | Checklist item                                                                                                                                                                                                                                                                                              | Reported on page # |
|------------------------------------|----|-------------------------------------------------------------------------------------------------------------------------------------------------------------------------------------------------------------------------------------------------------------------------------------------------------------|--------------------|
| <b>TITLE</b>                       |    |                                                                                                                                                                                                                                                                                                             |                    |
| Title                              | 1  | Identify the report as a systematic review, meta-analysis, or both.                                                                                                                                                                                                                                         | 1                  |
| <b>ABSTRACT</b>                    |    |                                                                                                                                                                                                                                                                                                             |                    |
| Structured summary                 | 2  | Provide a structured summary including, as applicable: background; objectives; data sources; study eligibility criteria, participants, and interventions; study appraisal and synthesis methods; results; limitations; conclusions and implications of key findings; systematic review registration number. | 2                  |
| <b>INTRODUCTION</b>                |    |                                                                                                                                                                                                                                                                                                             |                    |
| Rationale                          | 3  | Describe the rationale for the review in the context of what is already known.                                                                                                                                                                                                                              | 3-4                |
| Objectives                         | 4  | Provide an explicit statement of questions being addressed with reference to participants, interventions, comparisons, outcomes, and study design (PICOS).                                                                                                                                                  | 3-4                |
| <b>METHODS</b>                     |    |                                                                                                                                                                                                                                                                                                             |                    |
| Protocol and registration          | 5  | Indicate if a review protocol exists, if and where it can be accessed (e.g., Web address), and, if available, provide registration information including registration number.                                                                                                                               | 4                  |
| Eligibility criteria               | 6  | Specify study characteristics (e.g., PICOS, length of follow-up) and report characteristics (e.g., years considered, language, publication status) used as criteria for eligibility, giving rationale.                                                                                                      | 4-5                |
| Information sources                | 7  | Describe all information sources (e.g., databases with dates of coverage, contact with study authors to identify additional studies) in the search and date last searched.                                                                                                                                  | 5                  |
| Search                             | 8  | Present full electronic search strategy for at least one database, including any limits used, such that it could be repeated.                                                                                                                                                                               | Appendix 3         |
| Study selection                    | 9  | State the process for selecting studies (i.e., screening, eligibility, included in systematic review, and, if applicable, included in the meta-analysis).                                                                                                                                                   | 5-6                |
| Data collection process            | 10 | Describe method of data extraction from reports (e.g., piloted forms, independently, in duplicate) and any processes for obtaining and confirming data from investigators.                                                                                                                                  | 5-6                |
| Data items                         | 11 | List and define all variables for which data were sought (e.g., PICOS, funding sources) and any assumptions and simplifications made.                                                                                                                                                                       | 5-6                |
| Risk of bias in individual studies | 12 | Describe methods used for assessing risk of bias of individual studies (including specification of whether this was done at the study or outcome level), and how this information is to be used in any data synthesis.                                                                                      | 6                  |
| Summary measures                   | 13 | State the principal summary measures (e.g., risk ratio, difference in means).                                                                                                                                                                                                                               | 7                  |
| Synthesis of results               | 14 | Describe the methods of handling data and combining results of studies, if done, including measures of consistency (e.g., I <sup>2</sup> ) for each meta-analysis.                                                                                                                                          | 7                  |



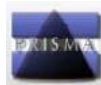

# PRISMA 2009 Checklist

Page 1 of 2

| Section/topic                 | #  | Checklist item                                                                                                                                                                                           | Reported on page # |
|-------------------------------|----|----------------------------------------------------------------------------------------------------------------------------------------------------------------------------------------------------------|--------------------|
| Risk of bias across studies   | 15 | Specify any assessment of risk of bias that may affect the cumulative evidence (e.g., publication bias, selective reporting within studies).                                                             | 6                  |
| Additional analyses           | 16 | Describe methods of additional analyses (e.g., sensitivity or subgroup analyses, meta-regression), if done, indicating which were pre-specified.                                                         | 7                  |
| <b>RESULTS</b>                |    |                                                                                                                                                                                                          |                    |
| Study selection               | 17 | Give numbers of studies screened, assessed for eligibility, and included in the review, with reasons for exclusions at each stage, ideally with a flow diagram.                                          | 7, Figure 1        |
| Study characteristics         | 18 | For each study, present characteristics for which data were extracted (e.g., study size, PICOS, follow-up period) and provide the citations.                                                             | 7-8, Table 1       |
| Risk of bias within studies   | 19 | Present data on risk of bias of each study and, if available, any outcome level assessment (see item 12).                                                                                                | 8, Table 2         |
| Results of individual studies | 20 | For all outcomes considered (benefits or harms), present, for each study: (a) simple summary data for each intervention group (b) effect estimates and confidence intervals, ideally with a forest plot. | Tables 3-5         |
| Synthesis of results          | 21 | Present results of each meta-analysis done, including confidence intervals and measures of consistency.                                                                                                  | N/A                |
| Risk of bias across studies   | 22 | Present results of any assessment of risk of bias across studies (see Item 15).                                                                                                                          | 8, Table 2         |
| Additional analysis           | 23 | Give results of additional analyses, if done (e.g., sensitivity or subgroup analyses, meta-regression [see Item 16]).                                                                                    | N/A                |
| <b>DISCUSSION</b>             |    |                                                                                                                                                                                                          |                    |
| Summary of evidence           | 24 | Summarize the main findings including the strength of evidence for each main outcome; consider their relevance to key groups (e.g., healthcare providers, users, and policy makers).                     | 11-13              |
| Limitations                   | 25 | Discuss limitations at study and outcome level (e.g., risk of bias), and at review-level (e.g., incomplete retrieval of identified research, reporting bias).                                            | 11-12              |
| Conclusions                   | 26 | Provide a general interpretation of the results in the context of other evidence, and implications for future research.                                                                                  | 12-13              |
| <b>FUNDING</b>                |    |                                                                                                                                                                                                          |                    |
| Funding                       | 27 | Describe sources of funding for the systematic review and other support (e.g., supply of data); role of funders for the systematic review.                                                               | 14                 |

From: Moher D, Liberati A, Tetzlaff J, Altman DG, The PRISMA Group (2009). Preferred Reporting Items for Systematic Reviews and Meta-Analyses: The PRISMA Statement. PLoS Med 6(7): e1000097. doi:10.1371/journal.pmed1000097

For peer review only - <http://bmjopen.bmj.com/site/about/guidelines.xhtml>

For more information, visit: [www.prisma-statement.org](http://www.prisma-statement.org).

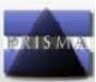

# PRISMA 2009 Checklist

- 1
- 2
- 3
- 4
- 5
- 6
- 7
- 8
- 9
- 10
- 11
- 12
- 13
- 14
- 15
- 16
- 17
- 18
- 19
- 20
- 21
- 22
- 23
- 24
- 25
- 26
- 27
- 28
- 29
- 30
- 31
- 32
- 33
- 34
- 35
- 36
- 37
- 38
- 39
- 40
- 41
- 42
- 43
- 44
- 45
- 46
- 47
- 48
- 49

For peer review only

## Appendix 2: Search terms

### MEDLINE (Ovid) (1946 to 17 October 2016)

- 1 Epidemiologic Studies/
- 2 exp Case-Control Studies/
- 3 exp Cohort Studies/
- 4 Cross-Sectional Studies/
- 5 (epidemiologic adj (study or studies)).ab,ti.
- 6 case control.ab,ti.
- 7 (cohort adj (study or studies)).ab,ti.
- 8 cross sectional.ab,ti.
- 9 cohort analy\$.ab,ti.
- 10 (follow up adj (study or studies)).ab,ti.
- 11 longitudinal.ab,ti.
- 12 retrospective\$.ab,ti.
- 13 prospective\$.ab,ti.
- 14 (observ\$ adj3 (study or studies)).ab,ti.
- 15 exp clinical study/
- 16 randomized controlled trial/
- 17 15 not 16
- 18 adverse effect?.ab,ti.
- 19 1 or 2 or 3 or 4 or 5 or 6 or 7 or 8 or 9 or 10 or 11 or 12 or 13 or 14 or 17 or 18
- 20 Arthroplasty, Replacement, Knee/
- 21 Knee Prosthesis/
- 22 (arthoplast\$ adj3 knee\$).mp. [mp=title, abstract, original title, name of substance word, subject heading word, keyword heading word, protocol supplementary concept word, rare disease supplementary concept word, unique identifier]
- 23 (knee\$ adj3 replac\$).mp. [mp=title, abstract, original title, name of substance word, subject heading word, keyword heading word, protocol supplementary concept word, rare disease supplementary concept word, unique identifier]

1  
2  
3 24 (knee adj3 implant\$.mp. [mp=title, abstract, original title, name of substance word,  
4 subject heading word, keyword heading word, protocol supplementary concept word, rare  
5 disease supplementary concept word, unique identifier]  
6  
7

8 25 20 or 21 or 22 or 23 or 24  
9

10 26 19 and 25  
11  
12

13  
14 **EMBASE (Ovid) (1980 to 17 October 2016)**  
15

16 1 Epidemiologic Studies/  
17

18 2 exp Case-Control Studies/  
19

20 3 exp Cohort Studies/  
21

22 4 Cross-Sectional Studies/  
23

24 5 (epidemiologic adj (study or studies)).ab,ti.  
25

26 6 case control.ab,ti.  
27

28 7 (cohort adj (study or studies)).ab,ti.  
29

30 8 cross sectional.ab,ti.  
31

32 9 cohort analy\$.ab,ti.  
33

34 10 (follow up adj (study or studies)).ab,ti.  
35

36 11 longitudinal.ab,ti.  
37

38 12 retrospective\$.ab,ti.  
39

40 13 prospective\$.ab,ti.  
41

42 14 (observ\$ adj3 (study or studies)).ab,ti.  
43

44 15 exp clinical study/  
45

46 16 randomized controlled trial/  
47

48 17 15 not 16  
49

50 18 adverse effect?.ab,ti.  
51

52 19 1 or 2 or 3 or 4 or 5 or 6 or 7 or 8 or 9 or 10 or 11 or 12 or 13 or 14 or 17 or 18  
53

54 20 Arthroplasty, Replacement, Knee/  
55

56 21 Knee Prosthesis/  
57

58 22 (arthoplast\$ adj3 knee\$.mp. [mp=title, abstract, original title, name of substance  
59 word, subject heading word, keyword heading word, protocol supplementary concept word,  
60 rare disease supplementary concept word, unique identifier]

1  
2  
3  
4  
5  
6  
7  
8  
9  
10  
11  
12  
13  
14  
15  
16  
17  
18  
19  
20  
21  
22  
23  
24  
25  
26  
27  
28  
29  
30  
31  
32  
33  
34  
35  
36  
37  
38  
39  
40  
41  
42  
43  
44  
45  
46  
47  
48  
49  
50  
51  
52  
53  
54  
55  
56  
57  
58  
59  
60

23 (knee\$ adj3 replac\$).mp. [mp=title, abstract, original title, name of substance word, subject heading word, keyword heading word, protocol supplementary concept word, rare disease supplementary concept word, unique identifier]

24 (knee adj3 implant\$).mp. [mp=title, abstract, original title, name of substance word, subject heading word, keyword heading word, protocol supplementary concept word, rare disease supplementary concept word, unique identifier]

25 20 or 21 or 22 or 23 or 24

26 19 and 25

### PsycINFO (inception [1806] to 23 March 2016

1. (knee\$ adj3 arthoplast\$).mp. [mp=title, abstract, heading word, table of contents, key concepts, original title, tests & measures]

2. (knee\$ adj3 replac\$).mp. [mp=title, abstract, heading word, table of contents, key concepts, original title, tests & measures]

3. (knee\$ adj3 surg\$).mp. [mp=title, abstract, heading word, table of contents, key concepts, original title, tests & measures]

4. (knee\$ adj3 implant\$).mp. [mp=title, abstract, heading word, table of contents, key concepts, original title, tests & measures]

5. (knee adj3 prosthe\$).mp. [mp=title, abstract, heading word, table of contents, key concepts, original title, tests & measures]

6. 1 or 2 or 3 or 4 or 5

### Appendix 3: Ongoing studies

Ongoing (in recruitment or active) studies identified in a search of ClinicalTrials.gov on the 18<sup>th</sup> August 2017 using search terms of ‘pain’, ‘observational studies’, ‘knee replacement’, and ‘adult, senior’

| ClinicalTrials.gov Identifier | Study title                                                                                                  | Status                      | Sponsor                                  | Estimated enrollment | Post-operative risk factor(s)                                                                                          | Pain outcome(s)                                                |
|-------------------------------|--------------------------------------------------------------------------------------------------------------|-----------------------------|------------------------------------------|----------------------|------------------------------------------------------------------------------------------------------------------------|----------------------------------------------------------------|
| NCT01320150                   | Risk Factors and Mechanisms for Persistent Postsurgical Pain After Total Knee Replacement                    | Recruiting                  | Rush University Medical Center           | 300                  | Area of secondary mechanical hyperalgesia or hypoalgesia, pain intensity                                               | Numerical Rating Scale at 6 months post-operative              |
| NCT02626533                   | Persistent Postoperative Pain and Joint Stiffness After Total Knee Arthroplasty Performed for Osteoarthritis | Recruiting                  | Hospital for Special Surgery, New York   | 186                  | Range of motion, pain intensity, KOOS scores, neuropathic pain, time to attainment of inpatient physical therapy goals | Numerical Rating Scale at 6 months post-operative              |
| NCT01390298                   | Pain and Function After Orthopedic Surgery                                                                   | Recruiting                  | Wake Forest University                   | 75                   | Pain                                                                                                                   | McGill Pain Questionnaire Short Form at post-operative day 168 |
| NCT02156453                   | Functional Recovery After Total Knee Arthroplasty                                                            | Recruiting                  | Mahidol University                       | 60                   | Pain, function                                                                                                         | Visual Analogue Scale at 1 year post-operative                 |
| NCT02579538                   | Flexibility of Cognition And Persistent Pain                                                                 | Ongoing, but not recruiting | Washington University School of Medicine | 300                  | Pain                                                                                                                   | Pain at 1 year post-operative                                  |
