# Supplementary material for: Post-operative patient-related risk factors for chronic pain after total knee replacement: a systematic review
Source: PubMed Central journal article supplement (PMC5695416; doi:10.1136/bmjopen-2017-018105), 2017-11-03
Supplement: bmjopen-2017-018105supp002.pdf [file bmjopen-2017-018105supp002.pdf]

## Appendix 2: Search terms

### MEDLINE (Ovid) (1946 to 17 October 2016)

- 1 Epidemiologic Studies/
- 2 exp Case-Control Studies/
- 3 exp Cohort Studies/
- 4 Cross-Sectional Studies/
- 5 (epidemiologic adj (study or studies)).ab,ti.
- 6 case control.ab,ti.
- 7 (cohort adj (study or studies)).ab,ti.
- 8 cross sectional.ab,ti.
- 9 cohort analy\$.ab,ti.
- 10 (follow up adj (study or studies)).ab,ti.
- 11 longitudinal.ab,ti.
- 12 retrospective\$.ab,ti.
- 13 prospective\$.ab,ti.
- 14 (observ\$ adj3 (study or studies)).ab,ti.
- 15 exp clinical study/
- 16 randomized controlled trial/
- 17 15 not 16
- 18 adverse effect?.ab,ti.
- 19 1 or 2 or 3 or 4 or 5 or 6 or 7 or 8 or 9 or 10 or 11 or 12 or 13 or 14 or 17 or 18
- 20 Arthroplasty, Replacement, Knee/
- 21 Knee Prosthesis/
- 22 (arthoplast\$ adj3 knee\$).mp. [mp=title, abstract, original title, name of substance word, subject heading word, keyword heading word, protocol supplementary concept word, rare disease supplementary concept word, unique identifier]
- 23 (knee\$ adj3 replac\$).mp. [mp=title, abstract, original title, name of substance word, subject heading word, keyword heading word, protocol supplementary concept word, rare disease supplementary concept word, unique identifier]

24 (knee adj3 implant\$).mp. [mp=title, abstract, original title, name of substance word, subject heading word, keyword heading word, protocol supplementary concept word, rare disease supplementary concept word, unique identifier]

25 20 or 21 or 22 or 23 or 24

26 19 and 25

### **EMBASE (Ovid) (1980 to 17 October 2016)**

1 Epidemiologic Studies/

2 exp Case-Control Studies/

3 exp Cohort Studies/

4 Cross-Sectional Studies/

5 (epidemiologic adj (study or studies)).ab,ti.

6 case control.ab,ti.

7 (cohort adj (study or studies)).ab,ti.

8 cross sectional.ab,ti.

9 cohort analy\$.ab,ti.

10 (follow up adj (study or studies)).ab,ti.

11 longitudinal.ab,ti.

12 retrospective\$.ab,ti.

13 prospective\$.ab,ti.

14 (observ\$ adj3 (study or studies)).ab,ti.

15 exp clinical study/

16 randomized controlled trial/

17 15 not 16

18 adverse effect?.ab,ti.

19 1 or 2 or 3 or 4 or 5 or 6 or 7 or 8 or 9 or 10 or 11 or 12 or 13 or 14 or 17 or 18

20 Arthroplasty, Replacement, Knee/

21 Knee Prosthesis/

22 (arthoplast\$ adj3 knee\$).mp. [mp=title, abstract, original title, name of substance word, subject heading word, keyword heading word, protocol supplementary concept word, rare disease supplementary concept word, unique identifier]

23 (knee\$ adj3 replac\$).mp. [mp=title, abstract, original title, name of substance word, subject heading word, keyword heading word, protocol supplementary concept word, rare disease supplementary concept word, unique identifier]

24 (knee adj3 implant\$).mp. [mp=title, abstract, original title, name of substance word, subject heading word, keyword heading word, protocol supplementary concept word, rare disease supplementary concept word, unique identifier]

25 20 or 21 or 22 or 23 or 24

26 19 and 25

### **PsycINFO (inception [1806] to 23 March 2016**

1. (knee\$ adj3 arthoplast\$).mp. [mp=title, abstract, heading word, table of contents, key concepts, original title, tests & measures]

2. (knee\$ adj3 replac\$).mp. [mp=title, abstract, heading word, table of contents, key concepts, original title, tests & measures]

3. (knee\$ adj3 surg\$).mp. [mp=title, abstract, heading word, table of contents, key concepts, original title, tests & measures]

4. (knee\$ adj3 implant\$).mp. [mp=title, abstract, heading word, table of contents, key concepts, original title, tests & measures]

5. (knee adj3 prosthe\$).mp. [mp=title, abstract, heading word, table of contents, key concepts, original title, tests & measures]

6. 1 or 2 or 3 or 4 or 5
