# Supplementary material for: Post-operative patient-related risk factors for chronic pain after total knee replacement: a systematic review
Source: PubMed Central journal article supplement (PMC5695416; doi:10.1136/bmjopen-2017-018105), 2017-11-03
Supplement: bmjopen-2017-018105supp003.pdf [file bmjopen-2017-018105supp003.pdf]

### Appendix 3: Ongoing studies

Ongoing (in recruitment or active) studies identified in a search of ClinicalTrials.gov on the 18<sup>th</sup> August 2017 using search terms of ‘pain’, ‘observational studies’, ‘knee replacement’, and ‘adult, senior’

| ClinicalTrials.gov Identifier | Study title                                                                                                  | Status                      | Sponsor                                  | Estimated enrollment | Post-operative risk factor(s)                                                                                          | Pain outcome(s)                                                |
|-------------------------------|--------------------------------------------------------------------------------------------------------------|-----------------------------|------------------------------------------|----------------------|------------------------------------------------------------------------------------------------------------------------|----------------------------------------------------------------|
| NCT01320150                   | Risk Factors and Mechanisms for Persistent Postsurgical Pain After Total Knee Replacement                    | Recruiting                  | Rush University Medical Center           | 300                  | Area of secondary mechanical hyperalgesia or hypoalgesia, pain intensity                                               | Numerical Rating Scale at 6 months post-operative              |
| NCT02626533                   | Persistent Postoperative Pain and Joint Stiffness After Total Knee Arthroplasty Performed for Osteoarthritis | Recruiting                  | Hospital for Special Surgery, New York   | 186                  | Range of motion, pain intensity, KOOS scores, neuropathic pain, time to attainment of inpatient physical therapy goals | Numerical Rating Scale at 6 months post-operative              |
| NCT01390298                   | Pain and Function After Orthopedic Surgery                                                                   | Recruiting                  | Wake Forest University                   | 75                   | Pain                                                                                                                   | McGill Pain Questionnaire Short Form at post-operative day 168 |
| NCT02156453                   | Functional Recovery After Total Knee Arthroplasty                                                            | Recruiting                  | Mahidol University                       | 60                   | Pain, function                                                                                                         | Visual Analogue Scale at 1 year post-operative                 |
| NCT02579538                   | Flexibility of Cognition And Persistent Pain                                                                 | Ongoing, but not recruiting | Washington University School of Medicine | 300                  | Pain                                                                                                                   | Pain at 1 year post-operative                                  |
